1 **TITLE:** Sleep is bi-directionally modified by amyloid beta oligomers

2 **AUTHORS:** Güliz Gürel Özcan<sup>1</sup>, Sumi Lim<sup>1</sup>, Patricia L.A. Leighton<sup>2,3</sup>, W. Ted Allison<sup>2,3</sup>, Jason  
3 Rihel<sup>1\*</sup>

4 **AFFILIATIONS:**

5 1 Department of Cell and Developmental Biology, UCL, Gower Street, London, United  
6 Kingdom WC1E 6BT

7 2 Centre for Prions & Protein Folding Disease, University of Alberta, Edmonton AB, T6G 2M8,  
8 CANADA

9 3 Department of Biological Sciences, University of Alberta, Edmonton AB, T6G 2E9,  
10 CANADA

11 **\*CORRESPONDENCE:** [j.rihel@ucl.ac.uk](mailto:j.rihel@ucl.ac.uk)

12 **HIGHLIGHTS:**

- 13 • **Amyloid beta oligomers can drive either sleep or wakefulness, depending on their**  
14 **size**
- 15 • **Wakefulness driven by short amyloid beta oligomers requires binding partners**  
16 **Adrenergic Beta Receptor 2 and Pgrmc1**
- 17 • **Long amyloid beta oligomers drive sleep through interaction with Prion Protein**
- 18 • **The in vivo sleep effects of amyloid beta can be pharmacologically blocked by**  
19 **targeting several steps of the Amyloid beta-Prion Protein signalling cascade.**

20

21 **SUMMARY:**

22 Disrupted sleep is a major feature of Alzheimer's Disease (AD), often arising years before  
23 symptoms of cognitive decline. Prolonged wakefulness exacerbates the production of amyloid-  
24 beta ( $A\beta$ ) species, a major driver of AD progression, suggesting that sleep loss further  
25 accelerates AD through a vicious cycle. However, the mechanisms by which  $A\beta$  affects sleep are  
26 unknown. We demonstrate in zebrafish that  $A\beta$  acutely and reversibly enhances or suppresses  
27 sleep as a function of oligomer length. Genetic disruptions revealed that short  $A\beta$  oligomers  
28 induce acute wakefulness through Adrenergic receptor b2 (*Adrb2*) and Progesterone membrane  
29 receptor component 1 (*Pgrmc1*), while longer  $A\beta$  forms induce sleep through a  
30 pharmacologically tractable Prion Protein (*PrP*) signalling cascade. Our data indicate that  $A\beta$  can  
31 trigger a bi-directional sleep/wake switch. Alterations to the brain's  $A\beta$  oligomeric milieu, such  
32 as during the progression of AD, may therefore disrupt sleep via changes in acute signalling  
33 events.

34

35 **INTRODUCTION:**

36 Accumulation of amyloid-beta ( $A\beta$ ) in plaques, along with tau tangles, is one of the two  
37 pathological hallmarks of Alzheimer's Disease (AD). Change in  $A\beta$  levels in the brain is one of  
38 the earliest known pathological events in AD and is detectable years before the development of  
39  $A\beta$  plaques and decades before the clinical onset of AD (Bateman et al., 2007; Jack et al., 2013).  
40 Because of its importance in AD progression,  $A\beta$  has been mostly characterized as a  
41 functionless, pathological, intrinsically neurotoxic peptide (Moir and Tanzi, 2019). However,  $A\beta$   
42 is an ancient neuropeptide conserved across vertebrates through at least 400 million years of

43 evolution (Moir and Tanzi, 2019). A $\beta$ 's cleavage from Amyloid Precursor Protein (APP) is  
44 tightly regulated by multiple enzymatic reactions (O'Brien and Wong, 2011), and its release from  
45 neurons is carefully controlled (Kamenetz et al., 2003). A $\beta$  interacts with numerous surface  
46 receptors and can activate intrinsic cellular signalling cascades to alter neuronal and synaptic  
47 function (Jarosz-Griffiths et al., 2016). More recently, A $\beta$  has been suggested to act as  
48 an antimicrobial peptide (Soscia et al., 2010), and the deposition of A $\beta$  may be induced as an  
49 innate immune defence mechanism against microbial pathogens (Kumar et al., 2016). However,  
50 the various biological effects of A $\beta$  in health or disease remain obscure.

51  
52 One of the earliest symptoms of AD is the disruption of sleep, and AD patients have sleep-wake  
53 abnormalities, including insomnia at night and increased napping during the day (Allen et al.,  
54 1987; Loewenstein et al., 1982; Moran et al., 2005; Prinz et al., 1982). Multiple transgenic AD  
55 mouse models that overproduce A $\beta$  also show disrupted sleep phenotypes (Roh et al., 2012;  
56 Sterniczuk et al., 2010; Wang et al., 2002), often in the absence of neuronal loss and preceding  
57 impairments of learning and memory (Irizarry et al., 1997). In non-pathological conditions, A $\beta$   
58 levels in the cerebrospinal fluid (CSF) are modulated by the sleep-wake cycle (Kang et al., 2009;  
59 Xie et al., 2013). A $\beta$  generation and release is controlled by electrical and synaptic activity  
60 (Cirrito et al., 2005; Kamenetz et al., 2003), leading to increased extracellular A $\beta$  levels during  
61 wakefulness and decreased levels during sleep (Kang et al., 2009; Xie et al., 2013). These  
62 observations have led to the proposal that sleep and A $\beta$  dynamics create a vicious feed-forward  
63 cycle, wherein increases in wakefulness result in increased extracellular A $\beta$  and aggregation,  
64 which then dysregulates sleep, further exacerbating pathogenic A $\beta$  production (Roh et al., 2012).  
65 How increased A $\beta$  burden leads to disruptions in sleep remains unknown, although AD-related

66 cell death of critical sleep/wake regulatory neurons has been suggested as a possible mechanism  
67 (Fronczek et al., 2012; Lim et al., 2014; Manaye et al., 2013).

68

69 Given the relationship between A $\beta$  and sleep, we hypothesized that A $\beta$  may directly modulate  
70 sleep-regulatory pathways independently of neuronal cell death. To test this, we took advantage  
71 of the ability to directly deliver small molecules and A $\beta$  peptides to the brain of larval zebrafish,  
72 which have conserved APP processing machinery and A $\beta$  peptides (Newman et al., 2014) and  
73 share genetic, pharmacological, and neuronal sleep-regulatory mechanisms with mammals  
74 (Barlow and Rihel, 2017). We found that A $\beta$  size-dependently and reversibly modulates behavior  
75 through two distinct genetic, pharmacologically tractable pathways that regulate sleep in  
76 opposing directions.

77

78 RESULTS:

### 79 **A $\beta$ dose-dependently modifies zebrafish sleep and wake behavior**

80 Isolating the specific biological effects of A $\beta$  has been experimentally difficult. One challenge is  
81 that A $\beta$  is processed from a series of complex cleavage steps of a longer transmembrane protein,  
82 Amyloid Precursor Protein (APP), which also produces other protein products with a variety of  
83 functions (O'Brien and Wong, 2011). This restricts the utility of genetic manipulations to tease  
84 out A $\beta$ -specific roles from the other APP components. Another challenge is that A $\beta$  forms, *in*  
85 *vitro* and *in vivo*, a variety of oligomeric species (e.g. dimers, longer oligomers, or large fibrils)  
86 with diverse structures, binding affinities, and signalling properties (Benilova et al., 2012;  
87 Jarosz-Griffiths et al., 2016). Teasing out the biological signalling capabilities of these diverse



88 oligomeric species requires selective manipulation of A $\beta$  oligomeric states, which is difficult *in*  
89 *vitro* and is currently nearly impossible endogenously *in vivo*.

90

91 To overcome some of these barriers, we developed an injection assay in which the amount and  
92 type of the A $\beta$  oligomers can be controlled and then tested the acute signaling effects of A $\beta$  on  
93 sleep and wake behavior. Our minimally invasive intra-cardiac injection assay in 5 days post  
94 fertilization (5dpf) larval zebrafish avoids direct damage to brain tissue (Figure 1A and 1B). This  
95 technique rapidly (<1hr, peaking within 2-3hrs) and reversibly delivers A $\beta$  to the larval brain, as  
96 assessed by injection of fluorescently tagged A $\beta$ 42 and subsequent confocal brain imaging  
97 (Figure 1B, Figure 1- figure supplement 1A, B). To generate different A $\beta$  oligomeric species, we  
98 modified previously established *in vitro* monomeric A $\beta$  incubation protocols (see Extended  
99 Methods) that enrich for A $\beta$  with different oligomeric sizes and opposing effects on rat neuronal  
100 excitability (Kusumoto et al., 1998; Orban et al., 2010; Whitcomb et al., 2015). By incubating  
101 A $\beta$ 42 overnight at increasing temperatures, we generated A $\beta$  oligomeric pools with significantly  
102 different lengths, as measured by Transmission Electron Microscopy (TEM) (Figures 1C and  
103 Figure 1- figure supplement 1C). A $\beta$ 42 incubated overnight at 4°C consisted of fewer and shorter  
104 oligomers (A $\beta^{\text{short}}$ , mean 45±11 nm, median=39nm) than when incubated at 25°C (A $\beta^{\text{long}}$ , mean  
105 75±10 nm, median=61nm) or at 37°C (A $\beta^{\text{v-long}}$ , mean 121±10 nm, median=88nm) (Figure 1C).

106

107 We then assessed how each A $\beta$  preparation affected sleep and wake behavior in zebrafish  
108 relative to an A $\beta$ 42-1 “reverse” peptide control (A $\beta^{\text{rev}}$ ) using automated video-monitoring  
109 (Prober et al., 2006; Rihel et al., 2010). In initial experiments, we determined the appropriate A $\beta$   
110 injection dose by injecting 1nL of a 1-1000 nM dose series for both A $\beta^{\text{short}}$  and A $\beta^{\text{long}}$  and

111 assessing subsequent waking activity and sleep, which is defined in zebrafish larvae as a period  
112 of inactivity lasting longer than one minute, which are associated with an increased arousal  
113 threshold and other features of behavioral sleep (Prober et al., 2006). Unexpectedly, these  
114 oligomeric species had opposing behavioral effects (Figure 1- figure supplement 1D-G).  $A\beta^{\text{short}}$   
115 increased waking activity and decreased sleep relative to  $A\beta$  reverse peptide, while  $A\beta^{\text{long}}$   
116 decreased waking and increased sleep (prep waking effect,  $p < 0.001$ ; prep sleep effect  $p < 0.05$ ,  
117 two-way ANOVA). These effects were generally consistent across doses, although some dose-  
118 responses elicited stronger differential effects than others (Figure 1- figure supplement 1D, E),  
119 with the maximal difference between the  $A\beta^{\text{short}}$  and  $A\beta^{\text{long}}$  preparations at 10 nM ( $p \leq 0.01$   
120 doseXprep interaction, two-way ANOVA). We estimate this dose yields a final concentration  
121 that falls within the lower range of physiological concentrations reported for  $A\beta_{42}$  in human  
122 CSF of 100 pM-5nM (Bateman et al., 2007). For example, assuming that all injected  $A\beta$  goes  
123 into the brain, the highest possible concentration would be 1500 pg/ml or 300 pM ( $45 \text{ ng/ml} \times 1$   
124  $\text{nl}$  in  $30.4 \text{ nl}$  brain =  $1.5 \text{ ng/ml} = 1500 \text{ pg/ml}$ ). At the lower end, assuming equal distribution of  $A\beta$   
125 over the whole body yields a final concentration estimate of 150 pg/ml or 30 pM ( $45 \text{ ng/ml} \times 1$   $\text{nl}$   
126 in  $300 \text{ nl}$  of body =  $150 \text{ pg/ml}$ ). We therefore continued with 10 nM injections for all subsequent  
127 experiments, as it combines the maximal differentially observed behavioral effects between  
128  $A\beta^{\text{short}}$  and  $A\beta^{\text{long}}$  with physiologically reasonable concentrations.

129

130  **$A\beta$  affects sleep and wake in opposing directions as a function of oligomer size and**  
131 **independently of neural death**

132 To explore the effect of  $A\beta$  oligomeric size on sleep, we then systematically tested the behavior  
133 effects of each  $A\beta$  species relative to a  $A\beta^{\text{rev}}$  control for  $n=3-5$  independent experiments each.

134 As in the dose response experiments, A $\beta$  affected sleep and wake in opposing directions  
135 depending on its oligomeric state (Figures 1D-1I'). In the day following injection, A $\beta^{\text{short}}$   
136 significantly increased waking activity by +12.8% and reduced total sleep relative to A $\beta^{\text{rev}}$  by  
137 15.5% (Figures 1D-E'). The magnitude of the sleep effect is likely partially masked by a flooring  
138 effect due to generally reduced sleep during the day; we therefore favor reporting effect sizes and  
139 confidence intervals as recommended (Amrhein et al., 2019; Ho et al., 2019). Indeed, if we were  
140 to combine all the additional control A $\beta^{\text{short}}$  experiments subsequently reported in this manuscript  
141 (n=160 A $\beta^{\text{rev}}$  n=164 A $\beta^{\text{short}}$ , see Figures 3G and 3H), the effect size remains robust at -15.9% and  
142 the result is statistically significant (p<0.05, one-way ANOVA). These effects were reversible, as  
143 there were no significant differences in sleep (Figure 1E, black bar) or waking activity (Figure  
144 1D, black bar) between A $\beta^{\text{short}}$  and reverse peptide in the night following injection, and the  
145 behavior of A $\beta^{\text{short}}$ -injected larvae returned to baseline levels in the subsequent day (Figure 1-  
146 figure supplement 3A).

147 In contrast, while injection of longer A $\beta$  fibers (A $\beta^{\text{v-long}}$ ) had no effect on behavior, (Figures 1H-  
148 I'), injection of the intermediate A $\beta^{\text{long}}$  oligomers significantly increased sleep during the post-  
149 injection day by +47.2% and reduced waking activity by 11.3% (Figures 1F-1G'). The increased  
150 sleep induced by A $\beta^{\text{long}}$  was due to a significant increase in the average number of sleep bouts  
151 but not an increase in sleep bout length (Figure 1J), indicating higher sleep initiation is  
152 responsible for the change in sleep rather than an increased sleep consolidation. This increased  
153 sleep effect by A $\beta^{\text{long}}$  was not observed in the night following injection (Figures 1F and 1G,  
154 black bar), and behavior returned to baseline by the following morning (Figure 1- figure  
155 supplement 3B).

156 This data is consistent with A $\beta^{\text{short}}$  increasing wakefulness and A $\beta^{\text{long}}$  decreasing wakefulness

157 and increasing sleep. Additional control experiments ruled out experimental artefacts, as larvae  
158 undergoing no treatment, anaesthesia only, mock injection, or PBS only injections had  
159 indistinguishable effects on sleep/wake (Figure 1- figure supplement 1H-J). Next, we  
160 recalculated the behavioral analysis only for the evening period before lights off, when vehicle-  
161 injected larvae were statistically indistinguishable from larvae that had been acclimated to the  
162 tracking rig for 24 hours (Figure 1- figure supplement 1J). Except for an even more severe  
163 flooring effect in the  $A\beta^{\text{short}}$  injection experiments, the results from evening-only analysis were  
164 indistinguishable from calculations across the whole day (Figure 1- figure supplement 1K). We  
165 therefore used full day analysis for all subsequent experiments.

166 We next considered if the dual-effects of  $A\beta$  on sleep and wake are due to either neuronal  
167 damage or generalized toxic effects, such as the induction of seizure, paralysis, or sickness  
168 behavior.

169 First, injection with either long or short forms of  $A\beta$  had no effect on apoptosis, as detected by  
170 staining for activation of Caspase-3 (Figure 1- figure supplement 2A-C). In addition,  $A\beta$  injected  
171 animals raised to adulthood showed no major differences in their general health or in their  
172 survival rates (Figure 1- figure supplement 2D). Moreover, injected animals recovered fully in  
173 the long term, returning to baseline sleep and activity levels within 24 hours (Figure 1- figure  
174 supplement 3A, B). Second, both  $A\beta^{\text{short}}$  and  $A\beta^{\text{long}}$  injected larvae responded normally to salient  
175 stimuli such as a light:dark pulse, demonstrating that these larvae were not paralyzed, in a coma,  
176 or undergoing sickness behavior (Figure 1- figure supplement 3C). Finally, we considered if the  
177 changes in motility in  $A\beta$ -injected larvae were seizure-like behaviors. Wild type (WT) zebrafish  
178 larvae display “burst-and-glide” movements characterized by single short forward or turn  
179 movement followed by a short pause (Figure 1- figure supplement 3D and Figure 1- video 1). In

180 contrast, epileptogenic drugs like the GABA-receptor antagonist PTZ induce  
181 electrophysiological and behavioural seizures (Baraban et al, 2005), which are observed as  
182 dramatic rearrangements in zebrafish bout structure (Figure 1-figure supplement D). The bout  
183 structure of  $A\beta^{\text{rev}}$ ,  $A\beta^{\text{short}}$ , and  $A\beta^{\text{long}}$  injected fish was highly similar to WT behavior (Figure 1-  
184 figure supplement 3D, E and Figure 1- video 1), and the high frequency bouts (HFB) indicative  
185 of seizures (Reichert et al., 2019) were only found in PTZ exposed fish but not  $A\beta$  injected  
186 larvae (Figure 1- figure supplement 3D, E). Together these experiments indicate that exposure to  
187  $A\beta$  modulates normal sleep/wake behaviour without inducing toxic states.

188

189 We conclude that the changes in behavior after  $A\beta$  exposure are due to acute signalling events  
190 and therefore sought to identify the neuronal and molecular substrates through which  $A\beta$  signals  
191 to modulate sleep/wake behavior.

192

193  **$A\beta^{\text{short}}$  and  $A\beta^{\text{long}}$  induce opposing changes in neuronal activity and differentially engage**  
194 **sleep-promoting neurons**

195 If  $A\beta$  oligomers alter behavior through acute signalling in the brain, the differential effects of  
196  $A\beta^{\text{short}}$  and  $A\beta^{\text{long}}$  should be reflected at the level of neuronal activity. In situ hybridization (ISH)  
197 for expression of the immediate early gene, *c-fos*, identified several discrete areas of the larval  
198 brain that are upregulated after injection of  $A\beta^{\text{short}}$  relative to  $A\beta^{\text{rev}}$ , including the posterior  
199 hypothalamus and the dorsal and ventral telencephalon (Figure 2A). Comparing the  $A\beta^{\text{short}}$   
200 induced *c-fos* patterns to WT brains collected at zeitgeber time 1 (ZT1, ZT0=lights ON), when  
201 larvae are maximally awake, reveals at least 9 populations of *c-fos* positive neurons in both  
202  $A\beta^{\text{short}}$  and waking brains (Figure 2A, C). In contrast, *c-fos* expression following  $A\beta^{\text{long}}$  injections

203 was globally dampened relative to  $A\beta^{rev}$  (Figure 2B) in a manner consistent with the low  
204 expression of *c-fos* in WT brains collected at ZT19, when larvae are maximally asleep (Figure  
205 2C).  
206  
207 Immediate early gene expression is an imperfect readout of changes in neuronal activity and  
208 brain state, as baseline *c-fos* is expressed in low amounts in zebrafish and has a relatively slow  
209 time course of 15-30 minutes for transcription of mRNA (Baraban et al., 2005). We therefore  
210 also quantified changes in the more rapid (<5 minutes) neuronal activity marker, phosphorylated  
211 ERK (p-ERK), using the larval zebrafish MAP-Mapping technique (Randlett et al., 2015). This  
212 method identifies the relative quantitative changes in brain region-specific levels of p-ERK  
213 relative to total ERK between  $A\beta$  injections and reverse peptide control conditions. Consistent  
214 with *c-fos* induction,  $A\beta^{short}$  upregulated P-ERK in the ventral telencephalon and posterior  
215 hypothalamus (Figures 2D and 2D', Figure 2-source data 1), while  $A\beta^{long}$  resulted in a  
216 widespread reduction in p-ERK levels throughout most of the brain (Figures 2E and 2E', Figure  
217 2-source data 2). These brain activity states are consistent with the induction of wakefulness by  
218  $A\beta^{short}$  and sleep by  $A\beta^{long}$ .  
219  
220 Finally, if the behavioral states induced by  $A\beta$  are bona fide sleep/wake states, we reasoned that  
221 known zebrafish sleep/wake regulatory neurons should be engaged. Galanin-expressing neurons  
222 of the preoptic area and hypothalamus are active and upregulate *galanin* transcription during  
223 zebrafish sleep (Reichert et al, 2019). Similarly, ISH for galanin 4-6 hours post-injection of  $A\beta$   
224 oligomers revealed that wake-promoting  $A\beta^{short}$  slightly decreased (-6%, blinded counts), while  
225 sleep-promoting  $A\beta^{long}$  slightly increased (+12%, blinded counts), the number of *galanin* positive

226 cells in the hypothalamus compared to  $A\beta^{rev}$  injected larvae (Figure 2F-G). The differential  
227 effects on *galanin* neurons are consistent with that the induction of wakefulness by  $A\beta^{short}$  and  
228 sleep by  $A\beta^{long}$ .

229

### 230 **$A\beta$ binding targets are required for behavioral responses to $A\beta$**

231 Many candidate  $A\beta$  binding partners have been implicated in mediating the signalling effects of  
232  $A\beta$  on synapses, with some targets showing preferences for  $A\beta$  dimers, such as Adrenergic  
233 Receptor  $\beta 2$  (ADRB2) (Wang et al., 2010), or low molecular weight (50-75 kDa) species, such  
234 as the Progesterone Membrane Receptor Component 1 (PGRMC1) (Izzo et al., 2014b), while  
235 other targets preferentially bind to longer oligomers/protofibrils, such as the Prion Protein (PrP)  
236 (Lauren et al., 2009; Nicoll et al., 2013). We therefore used Crispr/Cas9 to make genetic lesions  
237 in several zebrafish candidate  $A\beta$  receptors, choosing examples with reported affinities for  
238 various sized  $A\beta$  oligomers (Figures 3- figure supplement 1 and Figure 4 – figure supplement 1).  
239 We isolated a *pgrmc1* allele with a 16 bp deletion that leads to a frameshift and early stop codon  
240 that truncates the protein before a conserved Cytochrome b5-like Heme/Steroid binding domain  
241 (Figure 3- figure supplement 1A-D). We also isolated an *adrb2a* allele with an 8bp deletion that  
242 leads to a severely truncated protein lacking all transmembrane domains (Figure 3- figure  
243 supplement 1E-G). We also obtained a *prp1*<sup>-/-</sup>;*prp2*<sup>-/-</sup> double mutant (Fleisch et al., 2013;  
244 Leighton et al., 2018) that lacks both zebrafish Prp proteins with conserved  $A\beta$  binding sites  
245 (Figure 4 -figure supplement 1). The third zebrafish *prion* gene product, Prp3, does not have the  
246 conserved  $A\beta$  binding domains present in Prp1 and Prp2 (Figure 4 -figure supplement 1). Except  
247 for a mild increase in daytime sleep in *adrb2a*<sup>-/-</sup> mutants (Figure 3 -figure supplement 2D'-F'),  
248 none of these mutants exhibited changes in baseline sleep and wake on a 14hr:10hr light:dark

249 cycle as compared to wild type and heterozygous siblings (Figures 3- figure supplement 2A-F’;  
250 Figures 4- figure supplement 2A-F’). Under baseline conditions, we also detected no significant  
251 differences in day or night sleep and waking activity in *prp* double mutants compared to *prp*<sup>+/+</sup>  
252 siblings generated from either *prp1*<sup>+/-</sup>; *prp2*<sup>+/-</sup> or *prp1*<sup>+/-</sup>; *prp2*<sup>-/-</sup> in-crosses (Figure 4- figure  
253 supplement 2A-F’). The mild baseline phenotypes allowed us to test the effect of A $\beta$  oligomers  
254 in these mutants without complex behavioral confounds.

255

256 We first tested the effects of A $\beta$ <sup>short</sup> injection on mutant behavior. Unlike the wild type controls,  
257 neither the *adrb2a*<sup>-/-</sup> nor the *pgrmc1*<sup>-/-</sup> mutants increased waking activity (Figures 3A-3C and 3E)  
258 or suppressed sleep as observed in wild type controls (Figures 3A’-3C’ and 3G). Injection of  
259 A $\beta$ <sup>short</sup> into *adrb2a*<sup>-/-</sup> animals even significantly increased sleep (+83.7%) instead of reducing it  
260 as in wild type larvae (Figures 3B’ and 3G). In contrast, A $\beta$ <sup>short</sup> injected into mutants that lack  
261 both zebrafish Prp orthologs (*prp1*<sup>-/-</sup>; *prp2*<sup>-/-</sup>) elicited slightly stronger increases in waking  
262 activity and significantly large (-45%) reductions in sleep (Figures 3D, D’, F and H). Thus, the  
263 wake-promoting activity of A $\beta$ <sup>short</sup> requires intact Adrb2a and Pgrmc1 but not functional Prp1  
264 and Prp2.

265

266 Because the size of oligomeric species in our A $\beta$ <sup>long</sup> preparation (20-400 nm) falls into the size  
267 range that exhibits high-affinity binding to mammalian Prion Protein (PrP) (20-200 nm) and  
268 thereby acts to modulate synapses (Gimbel et al., 2010; Lauren et al., 2009; Nicoll et al., 2013;  
269 Um et al., 2012), we tested whether PrP is instead required for A $\beta$ <sup>long</sup>-induced sleep. After  
270 injection of A $\beta$ <sup>long</sup>, *prp1*<sup>-/-</sup>; *prp2*<sup>-/-</sup> null mutants failed to increase sleep compared to wild type  
271 controls (Figures 4A-D). The modest reduction of wakefulness induced by A $\beta$ <sup>long</sup> was even



272 reversed in *prp1<sup>-/-</sup>;prp2<sup>-/-</sup>* mutants, with  $A\beta^{\text{long}}$  instead significantly increasing wakefulness  
273 (Figure 4C). Thus, while Prps are not required for the wake-inducing effects of  $A\beta^{\text{short}}$ , functional  
274 Prp1 and Prp2 are essential for sleep induced by  $A\beta^{\text{long}}$ . Moreover, since *prp* double mutants  
275 have exacerbated wakefulness in response to  $A\beta^{\text{short}}$  injections, the sleep-inducing Prp pathway is  
276 likely co-activated along with the wake-promoting pathway by  $A\beta$  to partially dampen the  
277 behavioral response of wild type larvae (Figure 3D and 3H).

278

279 **Mutants lacking  $A\beta$  targets have altered brain activity in response to  $A\beta$  consistent with**  
280 **behavioral effects**

281 If  $A\beta^{\text{short}}$  interacts with *Adrb2a* and *Pgrmc1* to drive changes in wakefulness, the increased  
282 neuronal activity we observed in wild type larvae after  $A\beta^{\text{short}}$  injections (Figure 2A) should also  
283 be abolished in the *adrb2a<sup>-/-</sup>* and *pgrmc1<sup>-/-</sup>* mutant backgrounds. Consistently, lack of either  
284 *Adrb2a* or *Pgrmc1* abolished the neuronal activity-inducing effect of  $A\beta^{\text{short}}$  (Figure 5A), as  
285 detected by in situ hybridization for *c-fos*. In particular, the neuronal activity observed in the  
286 posterior hypothalamus and the dorsal and ventral telencephalon after  $A\beta^{\text{short}}$  into WT controls  
287 was not detected after injection into either *adrb2a<sup>-/-</sup>* or *pgrmc1<sup>-/-</sup>* mutants (Figure 5A). This result  
288 is consistent with  $A\beta^{\text{short}}$  failing to induce wakefulness in these mutants. Similarly, although  
289  $A\beta^{\text{long}}$  dampens neuronal activity when injected into wild type larvae,  $A\beta^{\text{long}}$  injections into the  
290 *prp1<sup>-/-</sup>; prp2<sup>-/-</sup>* double mutants elicited no reduction in *c-fos* expression (Figure 5B). Instead, *c-*  
291 *fos* expression in the telencephalon and hypothalamus was upregulated relative to reverse  
292 injected controls (Figure 5B), consistent with the increased behavioral wakefulness observed in  
293 the *prp* mutants (Figure 4C). Together, these data are consistent with  $A\beta^{\text{short}}$  acutely upregulating  
294 neuronal activity and behavioral wakefulness through interactions with *Adrb2a* and *Pgrmc1*,

295 while  $A\beta^{\text{long}}$  interactions with Prp drive increased sleep and a global reduction in neuronal  
296 activity.

297

298 **Pharmacological blockade of the Prp-mGluR5-Fyn kinase signalling cascade prevents sleep**  
299 **induction by  $A\beta^{\text{long}}$**

300 One of the advantages of using the zebrafish model system is the ability to perturb  $A\beta$  signalling  
301 cascades with small molecule inhibitors added directly to the water (Kokel et al., 2010; Rihel et  
302 al., 2010). To further dissect the  $A\beta^{\text{long}}$ -PrP sleep-inducing pathway, we focused on disrupting  
303 the putative signalling cascade downstream of  $A\beta$ -Prp interactions that lead to synaptic changes  
304 in neuronal culture (Um et al., 2012) (Figure 6A). Consistent with a role for direct  $A\beta^{\text{long}}$ -Prp  
305 interactions in sleep, soaking the larvae in Chicago Sky Blue 6B, a small molecule reported to  
306 disrupt  $A\beta$ -PrP interactions (Risse et al., 2015), significantly abolished the sleep-inducing effect  
307 of  $A\beta^{\text{long}}$  (Figures 6B, 6C, S7A and Figure 6-figure supplement 1A,B). Similarly,  
308 pharmacological inhibition of either of the putative  $A\beta$ -Prp downstream signalling components  
309 Metabotropic Glutamate Receptor 5 (mGluR5) or Fyn kinase (Um et al., 2013; Um et al., 2012)  
310 significantly blocked the sleep-inducing properties of  $A\beta^{\text{long}}$  (Figures 6D, 6E, Figure 6- figure  
311 supplement 1C, D). Both the mGluR5 inhibitor MPEP and the Src-kinase inhibitor saracatinib  
312 even resulted in significant sleep reductions after exposure to  $A\beta^{\text{long}}$ . Overall, these results are  
313 consistent with the effect of genetic ablation of *prp1* and *prp2*. Thus, both genetic and  
314 pharmacological interference with several steps of the  $A\beta$ -Prp-mGluR5-Fyn kinase signalling  
315 cascade prevents the ability of  $A\beta^{\text{long}}$  to increase sleep behavior.

316

317  **$A\beta^{\text{short}}$  and  $A\beta^{\text{long}}$  affect sleep through distinct neuronal/molecular pathways**

318 Although long and short oligomers require different receptors to affect behavior, they may act  
319 within the same neuronal circuit signalling cascade. If so, one phenotype should predominate  
320 over the other when the two oligomers are co-administered. Alternatively, oligomers may signal  
321 through parallel signalling circuits to bi-directionally modulate sleep in an additive manner. To  
322 test this, we co-injected  $A\beta^{\text{short}}$  and  $A\beta^{\text{long}}$  in a 1:1 ratio and compared the sleep phenotype to  
323 injection of either oligomer alone. As expected,  $A\beta^{\text{short}}$  alone reduced sleep and  $A\beta^{\text{long}}$  alone  
324 increased sleep. In contrast, co-injection of both  $A\beta^{\text{short}}$  and  $A\beta^{\text{long}}$  resulted in an intermediate  
325 phenotype that is indistinguishable from control injections of  $A\beta^{\text{rev}}$  (Figure 6F), suggesting that  
326 the effects of  $A\beta^{\text{short}}$  and  $A\beta^{\text{long}}$  are additive and likely act through distinct neuronal circuits or  
327 signalling cascades to modulate sleep.

328

329 Considering this result is aligned with the genetic and pharmacological data, we propose a bi-  
330 directional model of  $A\beta$  sleep regulation in which  $A\beta^{\text{short}}$  and  $A\beta^{\text{long}}$  act through distinct receptors  
331 and neuronal pathways to independently modulate behavioral state (Figure 6G). In this model,  
332 the presence of both oligomers leads a balance of signalling through sleep-promoting and sleep-  
333 inhibiting pathways, resulting in little or no change in behaviour. Tipping the balance from one  
334 oligomeric state to the other leads to either the sleep activating or the sleep inhibiting pathway to  
335 predominate.

336

## 337 **DISCUSSION**

338 Previous studies have suggested that changes in sleep during AD may further accelerate  $A\beta$   
339 accumulation and neuronal damage, creating a vicious cycle that leads to further neuronal  
340 dysregulation and increased sleep-wake cycle abnormalities (Roh et al., 2012). Our results show

341 that, depending on its oligomeric form, A $\beta$  can acutely increase or decrease sleep and wake  
342 behaviors and brain states through behaviorally relevant molecular targets and independently of  
343 neuronal cell death. The exogenous application of A $\beta$  oligomers in our experiments limit the  
344 conclusions we can draw about endogenous functions of A $\beta$ , which *in vivo* may present with  
345 different structure, local concentrations, and kinetics. However, the bi-directional A $\beta$  modulation  
346 of sleep and wakefulness (Figure 6G) predicts that alterations to the relative concentrations of  
347 different A $\beta$  oligomeric forms during healthy aging and AD disease progression will have  
348 opposing consequences on sleep and wake behavior.

349

### 350 **Distinct molecular pathways for A $\beta$ sleep-wake regulation**

351 We found that A $\beta^{\text{short}}$ -triggered wakefulness required intact *Adrb2a* and *Pgrmc1*, while A $\beta^{\text{long}}$ -  
352 induced sleep required functional *Prp* signalling. These data are consistent with a model in which  
353 A $\beta$  directly binds to these targets to modulate downstream signalling cascades that ultimately  
354 affect neuronal circuits that regulate behavioral state. Our results match well with previous  
355 reports demonstrating binding preferences of A $\beta$  dimers, trimers, and 56kDa oligomers for  
356 different targets *in vitro*. For example, A $\beta$  dimers, which have been detected in the brains of AD  
357 patients (Vazquez de la Torre et al., 2018), have been shown to directly bind human ADRB2  
358 with high-affinity, causing increased calcium influx and neuronal hyper-activation in rat  
359 prefrontal cortical slices (Wang et al., 2010). PGRMC1 can be activated by AD brain extracts  
360 (Izzo et al., 2014b) and also has shown preferential binding for 50-75 kDa A $\beta$  species *in vitro*  
361 (Izzo et al., 2014a). Both types of shorter A $\beta$  species that bind to ADRB2 and PGRMC1 fall  
362 within the size ranges that induce *Adrb2a*- and *Pgrmc1*-dependent wakefulness in zebrafish  
363 larvae. Our results are also consistent with studies that have identified PrP as a direct binding

364 partner (Lauren et al., 2009) for longer A $\beta$ -oligomers of 20-200 nm in length (Nicoll et al.,  
365 2013), the size range of our sleep-inducing A $\beta^{\text{long}}$  preparation. In neuronal culture and slice  
366 preparations, longer A $\beta$ -oligomers trigger reduction of synaptic strength (Lauren et al., 2009) via  
367 a Prp signalling cascade through mGluR5 and Fyn kinase activation (Um et al., 2012). Similarly,  
368 we found that pharmacological blockade of either the direct A $\beta$ -Prp interaction (with Chicago  
369 Sky Blue), mGluR5 signalling (with MPEP), Fyn kinase activity (with saracatinib), or by  
370 mutation of the Prp receptors prevented the widespread reduction of neuronal activity and  
371 increase in sleep that was induced by longer A $\beta$ -oligomers.

372  
373 Although triggering neuronal and behavioral changes through distinct molecular pathways,  
374 several aspects of A $\beta$ 's effects on sleep-wake regulation remain to be elucidated. For example,  
375 the elimination of either Adrb2a or Pgrmc1 is sufficient to fully prevent A $\beta^{\text{short}}$ -induced  
376 wakefulness. This suggests that Adrb2a and Pgrmc1 function in the same molecular pathway,  
377 and signalling by A $\beta$  on either alone is insufficient to modulate behavior. Not much is known  
378 about how these two receptors interact with one another, but at least one study (Roy et al., 2013)  
379 has suggested they can directly physically interact. Whether A $\beta^{\text{short}}$  binds both receptors to affect  
380 behavior or whether one receptor is an obligate component of the other's ability to transmit A $\beta$   
381 signals is currently unclear. It also remains unclear if the A $\beta^{\text{short}}$ -Adrb2a/Pgrmc1 wake pathway  
382 and the A $\beta^{\text{long}}$ -Prp sleep pathway occur in the same or different sets of neurons to modulate  
383 behavior, as these receptors have widespread expression in zebrafish (Cotto et al., 2005; Malaga-  
384 Trillo et al., 2009; Steele et al., 2011; Thisse, 2004; Wang et al., 2009), although our co-injection  
385 experiment suggests they act on parallel neuronal circuits. Numerous wake- and sleep-promoting  
386 neuronal populations that could serve as neuronal targets for these signalling cascades to drive

387 changes in behavioral state have been uncovered in zebrafish (Barlow and Rihel, 2017). Future  
388 experiments will be needed to tease out the neuronal components involved, for example by  
389 replacing functional receptors into candidate neurons in otherwise mutant animals and rescuing  
390 the responses to A $\beta$ , or by mutating receptors selectively in cell types with conditional genetics.

391

### 392 **Altered A $\beta$ oligomeric ratio—implications for sleep in health and AD**

393 Our model investigates alterations in sleep/wake behavior due to acute changes in exogenously  
394 delivered A $\beta$  levels. Thus, it is possible that the sleep/wake effects observed in our study may be  
395 different than those observed when A $\beta$  fluctuates over 24hr or when it is chronically  
396 accumulating as in AD. However, our model predicts that alterations to the ratio of A $\beta$   
397 oligomeric forms present in the brain could have differential effects on sleep-wake regulation, as  
398 the balance between sleep- and wake- promoting A $\beta$  signals is tilted to favour one pathway over  
399 the other (Figure 6G).

400

401 Given the natural daily increase in A $\beta$  secretion during wakefulness and increased levels of A $\beta$   
402 clearance during sleep (Xie et al., 2013), changes in extracellular A $\beta$  levels could sculpt behavior  
403 over the normal 24-hr circadian cycle. As A $\beta$  burden is acutely increased by sleep deprivation  
404 (Shokri-Kojori et al., 2018), perturbations to the normal sleep-wake cycle may feedback on  
405 behavior through altered A $\beta$  signalling. Other phenomena have been reported to alter A $\beta$   
406 generation and fibrilization over short time-scales. For example, temperature changes in the  
407 physiological range (35-42°C) have been reported to significantly affect A $\beta$  oligomerization  
408 (Ghavami et al., 2013), suggesting that either the natural daily fluctuation in body temperature  
409 (in humans, up to 2°C) or the induction of a fever can promote changes in amyloidogenic A $\beta$

410 generation (Szaruga et al., 2017). In addition, A $\beta$  can act as an antimicrobial peptide (Kumar et  
411 al., 2016; Soscia et al., 2010), and microbial infection can trigger A $\beta$  fibrilization (Eimer et al.,  
412 2018). Considering that infection and fever are also potent drivers of sleep (Imeri and Opp,  
413 2009), the sleep-inducing A $\beta$ -Prp signalling pathway we identified here could mediate recovery  
414 sleep during illness-- a hypothesis for future investigation.

415

416 On longer timescales, the amount and type of A $\beta$  oligomeric species (including dimers, cross-  
417 linked dimers, trimers, and 56 kDa oligomers) found in healthy brains change across the human  
418 life cycle (Lesne et al., 2013) and are heterogeneous and elevated in AD patients (Izzo et al.,  
419 2014a; Kostylev et al., 2015). Although the precise makeup of A $\beta$  species present in healthy and  
420 AD brains has remained difficult to quantify (Benilova et al., 2012), some studies have indicated  
421 that short (dimers, trimers) A $\beta$  oligomers are more enriched in the early, mild cognitive  
422 impairment (MCI) stages of AD, while longer oligomers predominate in the CSF at later clinical  
423 stages of AD (De et al., 2019). Similarly, AD progression is associated with increasingly large  
424 disruptions in sleep patterns, with patients exhibiting high levels of sleep fragmentation, a lack of  
425 circadian rhythm, night-time insomnia and irregular daytime napping throughout the day  
426 (Videnovic et al., 2014). One possibility consistent with our data is that sleep symptoms of both  
427 normal aging and AD may reflect changes in A $\beta$  burden that lead to an altered balance in sleep-  
428 and wake-promoting signalling cascades. These signalling molecules might therefore be  
429 potential therapeutic targets for treating disrupted sleep early in AD progression, which may in  
430 turn slow disease progression.

431

432 **Acknowledgments:**

433 We thank Tom Hawkins and Mark Turmaine for assistance with TEM, Gaia Gestri for  
434 assistance with heart injections and Marcus Ghosh for assistance with tERK/pERK  
435 experiments. We also thank Dervis Salih, Steve Wilson, and John Hardy for their comments  
436 and all first-floor fish lab members for their input throughout the project.

437

438 **Funding:** This was supported by operating funds to WTA from the Alzheimer Society of Alberta  
439 & Northwest Territories and Alberta Prion Research Institute of Alberta Innovates. PLAL was  
440 supported by Alzheimer Society of Canada, and JR was funded by an Interdisciplinary Research  
441 Grant from the Alzheimer's Research UK, an ERC Starting Grant (#282027), a Wellcome Trust  
442 Investigator Award (#217150/Z/19/Z), and a UCL Excellence Fellowship.

443 **Author Contributions:** GGO and JR conceived and designed the experiments. GGO  
444 performed all experiments with assistance from SL. GGO, JR, and SL analysed the data. GGO  
445 and SL generated the *adrb2a* and *pgrmc1* mutants. PLAL and WTA generated the *prp1* and  
446 *prp2* mutants. GGO and JR wrote the manuscript with input from all authors. JR supervised  
447 the project.

448 **Declaration of interests:** The authors declare no competing interests.

449 **Data and materials availability:** All data is available in the manuscript or the supplementary  
450 materials.

451 **List of Supplementary Materials:**

452 Materials and Methods

453 Key Resource Table



454 7 figure supplements

455 2 source data

456 1 video

457

458

459 **Figure Legends**

460 **Figure 1. A $\beta$  oligomers bi-directionally affect sleep and wake in zebrafish larvae.**

461 A) Experimental schematic. A $\beta$  was injected into the heart of 5 dpf larvae in the morning (ZT2=  
462 zeitgeber time 2, i.e. 2hr after lights on). Behavior was then monitored in a square-welled 96-  
463 well plate for 24-48 hrs on a 14hr:10hr light:dark cycle.

464 B) Heart-injected HiLyte<sup>TM</sup> Fluor 647-labeled A $\beta$ 42 (fA $\beta$ ) penetrated the whole larval brain as  
465 visualized by confocal microscopy (optical sections, dorsal view) taken 2 hr after injection.  
466 Anterior is to the top.

467 C) A $\beta$  prepared under increasing temperatures adopted longer oligomeric lengths, as measured  
468 by transmission electron microscopy. Each dot is a single oligomer (N=number measured), and  
469 the bars show the median. Data was taken from five randomly selected micrographs from two  
470 independent experiments. \*\*p $\leq$ 0.01, \*\*\*\*p $\leq$ 1x10<sup>-7</sup> Kruskal-Wallis, Tukey-Kramer post-hoc  
471 test.

472 D, E) Exemplar 24-hr traces post-injection comparing the effect of  $A\beta^{\text{short}}$  (blue) on  
473 average waking activity (D) and sleep (E) versus  $A\beta^{\text{rev}}$  controls (grey). Ribbons represent  $\pm$  the  
474 standard error of the mean (SEM). Light and dark bars indicate the lights ON and lights  
475 OFF periods, respectively. N= the number of larvae in each condition.

476 D', E') The effect of  $A\beta^{\text{short}}$  relative to  $A\beta^{\text{rev}}$  on waking (D') and sleep (E') during the first day is  
477 shown, pooled from n=5 independent experiments. Each dot represents a single larva normalized  
478 to the mean of the  $A\beta^{\text{rev}}$  control, and error bars indicate  $\pm$  SEM. The mean difference effect size  
479 and 95% confidence interval is plotted to the right. \* $p < 0.05$ ,  $T_p < 0.1$ , one-way ANOVA.

480 F, G) Exemplar 24-hr traces post-injection comparing the effect of  $A\beta^{\text{long}}$  (green) on  
481 average waking activity (F) and sleep (G) versus  $A\beta^{\text{rev}}$  controls (grey).

482 F', G') The effect of  $A\beta^{\text{long}}$  relative to  $A\beta^{\text{rev}}$  on waking (F') and sleep (G') during the first day is  
483 shown, pooled from n=4 independent experiments. \* $p < 0.05$ , \*\* $p < 0.01$ , one-way ANOVA.

484 H, I) Exemplar 24-hr traces post-injection comparing the effect of  $A\beta^{\text{v-long}}$  (magenta) on  
485 average waking activity (H) and sleep (I) versus  $A\beta$  reverse peptide controls (grey).

486 H', I') The effect of  $A\beta^{\text{v-long}}$  relative to  $A\beta^{\text{rev}}$  on waking (H') and sleep (I') during the first day is  
487 shown, pooled from n=3 independent experiments.

488 J) The effect of different  $A\beta$  preparations on the number of sleep bouts relative to  $A\beta^{\text{rev}}$  controls.  
489 The difference effect size and 95% confidence interval is plotted below. The asterisks indicate  
490 statistically significant different effects among the preps (\*\*\*) $p < 0.001$ , one-way ANOVA).

491 See also Figure 1-figure supplement 1-3.

492 **Figure 2. A $\beta$  oligomers differentially alter neuronal activity in the larval zebrafish brain.**

493 A) As detected by ISH, the immediate early gene *c-fos* is upregulated in many larval brain areas  
494 following A $\beta^{\text{short}}$  injection, including the dorsal and ventral telencephalon (tel) and the  
495 posterior hypothalamus (black arrowheads), relative to A $\beta$  reverse control injections. Other  
496 upregulated areas in the midbrain and hindbrain are indicated (white arrowheads). hyp-  
497 hypothalamus; hb- hindbrain. D=dorsal, P=Posterior, R=Right. n=blind counts of brains with the  
498 shown expression pattern/total brains. 24/43 stringently counts only brains with the major areas  
499 upregulated.

500 B) Compared to A $\beta^{\text{rev}}$  injections, A $\beta^{\text{long}}$  oligomers induce less *c-fos* expression. The A $\beta^{\text{rev}}$  and  
501 A $\beta^{\text{long}}$  treated brains were stained longer than in panel A) to ensure detection of weaker *c-fos*  
502 expression. n =blind counts of number of brains with the shown expression /total brains.

503 C) *c-fos* is upregulated in many larval brain areas at 10 am (ZT1) awake fish, including the  
504 dorsal and ventral telencephalon and the posterior hypothalamus (black arrowheads), and other  
505 discrete regions of the mid and hindbrain (white arrowheads). *c-fos* expression is downregulated  
506 in later timepoints (ZT13) and is very low in ZT19 brains, when larvae are predominantly asleep.  
507 N=10 fish/ timepoint.

508 D, D') Brain expression of the neuronal activity correlate pERK/tERK comparing A $\beta^{\text{short}}$  (n =6)  
509 to A $\beta^{\text{rev}}$  (n = 5) injected larvae identified areas upregulated (green) and downregulated (magenta)  
510 by A $\beta^{\text{short}}$ . Data are shown as a thresholded maximum projection overlaid on the Z-Brain Atlas  
511 tERK reference (gray). White arrowheads indicate regions in the ventral telencephalon and

512 posterior hypothalamus that are upregulated similar to *c-fos* in A). Dorsal view in D), lateral  
513 view in D').

514 E, E') pERK/tERK expression after  $A\beta^{long}$  injections (n=7) shows widespread downregulation of  
515 neuronal activity (magenta) compared to  $A\beta^{rev}$  controls (n=7), consistent with *c-fos* data in B.  
516 Dorsal view in E), lateral view in E').

517 F) As detected by ISH, the number and intensity of hypothalamic *galanin* positive neurons are  
518 downregulated following  $A\beta^{short}$  injection and upregulated following  $A\beta^{long}$  injection, relative to  
519  $A\beta$  reverse control injections. Representative images from N=22-24 per condition.

520 G) Normalized, blinded counts of hypothalamic *galanin*-positive cell numbers 4-6 hours after  
521  $A\beta^{short}$  and  $A\beta^{long}$  injections, relative to  $A\beta^{rev}$ . Error bars indicate  $\pm$  SEM. The mean difference  
522 effect size and 95% confidence interval is plotted at the bottom. \*\*p<0.01, one-way ANOVA.

523 See also Figure 2-source data 1 and 2.

524

525 **Figure 3. Wake induction by  $A\beta^{short}$  requires *Adrb2a* and *Pgrmc1*, but not the Prion**  
526 **Protein.**

527 A-D') Exemplar 24-hr traces comparing the effects of  $A\beta^{short}$  oligomers on average waking  
528 activity (A-D) and sleep (A'-D') versus  $A\beta^{rev}$  injected into wild type (A,A'), *adrb2a*<sup>-/-</sup> (B,B'),  
529 *pgrmc1*<sup>-/-</sup> (C,C'), and *prp1*<sup>-/-</sup>;*prp2*<sup>-/-</sup> mutants (D,D').

530 E-H) The effect of  $A\beta^{\text{short}}$  relative to  $A\beta^{\text{rev}}$  on normalized waking activity (E and F) and sleep (G  
531 and H) during the first day is shown. Each dot represents a single larva normalized to the mean  
532 of the  $A\beta^{\text{rev}}$  control, and error bars indicate  $\pm$  SEM. The mean difference effect size and 95%  
533 confidence interval are plotted below. N= the number of larvae. The wake inducing and sleep  
534 suppressing effects of  $A\beta^{\text{short}}$  are absent in (E,G)  $adrb2a^{-/-}$  and  $pgrmc1^{-/-}$  but enhanced in  $prp1^{-/-};prp2^{-/-}$   
535 mutants (F,H).  $^{ns}p>0.05$ ,  $^{*}p\leq 0.05$ ,  $^{**}p\leq 0.01$ ,  $^{***}p\leq 0.0001$ ,  $^{****}p\leq 10^{-5}$  one-way  
536 ANOVA. Data is pooled from n=2 independent experiments for  $adrb2a^{-/-}$  and  $pgrmc1^{-/-}$  and  
537 n=3 for  $prp1^{-/-};prp2^{-/-}$ .

538 See also Figure 3- figure supplement 1 and 2.

539

#### 540 **Figure 4. Sleep induction by $A\beta^{\text{long}}$ requires signalling through Prion Protein**

541 A-B') Exemplar 24-hr traces comparing the effects of  $A\beta^{\text{long}}$  oligomers on average waking  
542 activity (A,B) and sleep (A'-B') versus  $A\beta^{\text{rev}}$  on wild type (A,A'), and  $prp1^{-/-};prp2^{-/-}$  mutant  
543 (B,B') backgrounds.

544 C-D) The effect of  $A\beta^{\text{long}}$  relative to  $A\beta^{\text{rev}}$  on normalized waking (C) and sleep (D) on wild type  
545 and  $prp1^{-/-};prp2^{-/-}$  mutant backgrounds (mixed  $prp3$  background) during the first day is shown.  
546 The activity reducing (C) and sleep promoting (D) effects of  $A\beta^{\text{long}}$  are blocked in  $prp1^{-/-};prp2^{-/-}$   
547 mutants.  $^{**}p\leq 0.01$ ,  $^{****}p\leq 10^{-5}$  one-way ANOVA. Data is pooled from n=3 independent  
548 experiments.

549 See also Figure 4- figure supplement 1 and 2.

550

551 **Figure 5. Neuronal activity after exposure to A $\beta$  preparations is altered in mutants of A $\beta$**   
552 **binding targets**

553 A) After A $\beta^{\text{short}}$  injection into WT larvae (top right), *c-fos* is detected in many larval brain areas,  
554 including the dorsal and ventral telencephalon and posterior hypothalamus (black arrowheads),  
555 but not after injection of A $\beta$  reverse controls (left). In contrast, A $\beta^{\text{short}}$  injections into either  
556 *adrb2a*<sup>-/-</sup> (middle right) or *pgrmc1*<sup>-/-</sup> mutants do not induce *c-fos* expression. The brains in the  
557 middle and lower panels were stained longer than the WT (+/+) brains to ensure detection of  
558 weaker expression. D=dorsal, P=Posterior. n =blinded counts of brains with expression pattern/  
559 total brains.

560 B) Compared to A $\beta^{\text{rev}}$  injections, A $\beta^{\text{long}}$  oligomers induce less *c-fos* expression in WT larvae (top  
561 panels). In contrast, A $\beta^{\text{long}}$  induced relatively increased *c-fos* expression in the telencephalon and  
562 posterior hypothalamus (black arrows) in the *prp1*<sup>-/-</sup>, *prp2*<sup>-/-</sup> double mutants. These A $\beta^{\text{rev}}$  and  
563 A $\beta^{\text{long}}$  treated brains were stained longer to ensure detection of weaker *c-fos* expression.

564 D=dorsal, P=Posterior.

565 **Figure 6. Pharmacological blockade of the A $\beta^{\text{long}}$ -Prp-mGluR5-Fyn Kinase signalling**  
566 **cascade prevents increases in sleep.**

567 A) Schematic showing how A $\beta$ -Prp interactions signal through mGluR5 to activate Fyn kinase,  
568 leading to synaptic changes (Nygaard et al., 2014). Small molecules that block each step in the  
569 pathway are indicated.

570 B) Representative traces of sleep behavior after A $\beta^{\text{long}}$  versus A $\beta^{\text{rev}}$  injections in the absence  
571 (left) or presence (right) of the A $\beta$ -Prion binding disruptor, Chicago Sky Blue (3nM). Ribbons  
572 represent  $\pm$  SEM.

573 C) The effect of A $\beta^{\text{long}}$  relative to A $\beta^{\text{rev}}$  on normalized sleep during the first day in the in the  
574 absence or presence of 3nM Chicago Sky Blue. The data is pooled from n= 2 independent  
575 experiments \*\*p $\leq$ 0.01, one-way ANOVA.

576 D) Representative traces of sleep behavior after A $\beta^{\text{long}}$  versus A $\beta^{\text{rev}}$  injections in the presence of  
577 mGluR5 inhibitor MPEP (5uM, left) and Fyn Kinase inhibitor saracatinib (300 nM, right).  
578 Ribbons represent  $\pm$  SEM.

579 E) The effect of A $\beta^{\text{long}}$  relative to A $\beta^{\text{rev}}$  on normalized sleep during the first day in the absence or  
580 presence of 5 uM MPEP (left) and 300 nM saracatinib (right). Each dot represents a single larva  
581 normalized to the mean A $\beta^{\text{rev}}$ . Data is pooled from 2 independent experiments. \*\*p $\leq$ 0.01,  
582 \*\*\*\*p $\leq$ 10<sup>-5</sup> one-way ANOVA.

583 F) The effect of a 1:1 mixture of A $\beta^{\text{long}}$  to A $\beta^{\text{short}}$  relative to single injections of A $\beta^{\text{rev}}$ , A $\beta^{\text{short}}$ , and  
584 A $\beta^{\text{long}}$  on normalized sleep during the first day. The data is pooled from n= 4 independent  
585 experiments.

586

587 G) A bi-directional model for sleep/wake regulation by A $\beta$ . In wild type animals  
588 (centre), injection of A $\beta^{\text{short}}$  species signal through *Adrb2a/Pgrmc1* to drive wakefulness while  
589 A $\beta^{\text{long}}$  oligomers signal via *Prp* to induce sleep. In mutants that lack *Prp* (left), only A $\beta^{\text{short}}$   
590 species (as shown by the overlapping distributions) remain to inhibit sleep with no residual  
591 A $\beta^{\text{long}}$  oligomers to stimulate the sleep-inducing pathway to counteract wake-inducing signals.  
592 Thus *prp1<sup>-/-</sup>; prp2<sup>-/-</sup>* mutants have enhanced wakefulness in response to A $\beta$ . Conversely, mutants  
593 that lack *Adrb2a/Pgrmc1* (right), retain only the sleep-promoting A $\beta$  pathway and fail to increase  
594 wakefulness in response to A $\beta^{\text{short}}$ .  
595 See also Figure 6- figure supplement 1.

596

## 597 **Materials and Methods**

598 See the Key Resource Table (Supplementary File 1: Key Resources Table) for details of  
599 reagents.

### 600 *Zebrafish strains and husbandry*

601 Zebrafish (*Danio rerio*) were raised under standard conditions at 28°C in a 14:10 light:dark  
602 cycle and all zebrafish experiments and husbandry followed standard protocols of the UCL  
603 Zebrafish Facility. AB, TL and ABxTup wild-type strains were used in this study. *prp1*  
604 (*ua5003/ua5003*), *prp2* (*ua5001/5001*), *adrb2a* (*u511/u511*) and *pgrmc1* (*u512/u512*) mutants  
605 were outcrossed multiple times and *pgrmc1* F2 and *adrb2a* F2 generations were used for  
606 behavior. Ethical approval for zebrafish experiments was obtained from the Home Office UK  
607 under the Animal Scientific Procedures Act 1986 with Project licence numbers 70/7612 and  
608 PA8D4D0E5 to JR.

609



610 *A $\beta$  preparations*

611 HFIP treated A $\beta$ 42 peptide (JPT Peptide Technologies) and A $\beta$ 42-1 reversed peptide (Sigma)  
612 were dissolved in DMSO, vortexed occasionally for 12 min at room temperature and sonicated  
613 for 5 min to obtain 100  $\mu$ M solution. The stock solutions were aliquoted as 5  $\mu$ l in individual  
614 tubes and are kept at -80°C. 1  $\mu$ l of the 100  $\mu$ M stock was diluted in (Phosphate buffered saline)  
615 PBS to yield 10  $\mu$ M solutions which were incubated at 4°C, 25°C or 37°C for 24 hours  
616 (Kusumoto et al., 1998; Orban et al., 2010; Whitcomb et al., 2015). 1 hour before injecting, this  
617 stock was diluted to 10 nM using 1:10 serial dilutions in PBS and kept at the respective  
618 temperature (4°C, 25°C, 37°C) until injecting.

619

620 *Transmission Electron Microscopy (TEM)*

621 1  $\mu$ l of (4°C, 25°C or 37°C incubated) 10  $\mu$ M A $\beta$  solution was loaded onto formvar/carbon  
622 coated 300 mesh grids from Agar Scientific. The grid was washed twice in 20 mM phosphate  
623 buffer for 10 seconds and negatively stained in 2% aqueous uranyl acetate for 30 seconds. After  
624 drying for 2-3 days, samples were imaged using a Phillips TEM. At least 5 micrographs were  
625 used for each condition to blindly measure the length of the A $\beta$ 42 oligomeric structures using at  
626 least 30 measurements/condition. Using FIJI, 30-50 measurements were taken for each condition  
627 by drawing a free-hand line on the fibril, which was then scaled using the scale bar.

628

629 *Heart injections*

630 Injections were carried out blindly with a Pneumatic PicoPump (WPI) and glass capillary  
631 needles (Science Products GmbH) prepared with a Micropipette Puller (Shutter Instruments). 5  
632 dpf larvae were anesthetized using 4% Tricaine (42 mg/L, Sigma) 30 min before injections.

633 Larvae were immobilized in 1.8 % low melting point agarose (ThermoFischer) in fish water on  
634 their sides on a slide. 1 nL of A $\beta$  (10 nM starting concentration) was injected into the heart  
635 chamber of the fish along with a high molecular weight fluorescent dye (2000 kDa dextran-  
636 conjugated FITC (3 mg/ml, Sigma). We estimate that 1 nl of a 10 nM A $\beta$  injection into a  $\sim$ 3.01  
637 ( $\pm$ 0.16)  $\times 10^8 \mu\text{m}^3$  (285-317 nL) 5dpf larva<sup>43</sup> yields a final monomeric brain/CSF concentration of  
638  $\sim$ 28-32 pM. The success of the injection was checked under a standard fluorescent scope by the  
639 presence of fluorescence in the heart of the animal. Larvae were transferred to fresh fish water  
640 for 20 min to recover from Tricaine and transferred to sleep/wake behavior box. For drug  
641 blocking experiments, zebrafish larvae were soaked into 3 nM Chicago Sky Blue 6B (Sigma), 5  
642  $\mu\text{M}$  MPEP (Cambridge Biosciences), 300 nM Saracatinib (Generon) 1 day before the injections  
643 (from 4-5 dpf). Fluorescently tagged HiLyte™ Fluor 647-labeled A $\beta$ 42 (Eurogentech LTD) was  
644 injected at 10  $\mu\text{M}$ .

645

#### 646 *Behavioral experiments*

647 Larval zebrafish behavioral experiments were performed and analysed as described (Rihel et al.,  
648 2010). Briefly, 5 dpf larvae were transferred to 96 square-well plates and continuously  
649 illuminated with IR and white lights from 9 am to 11 pm in a Zebrabox (Viewpoint life sciences)  
650 for 24-48 hours. The movement of each larva was measured and duration of movement was  
651 recorded with an integration time of 10 sec. Data were processed according to Rihel et al.,  
652 (2010), and statistical tests were performed using MATLAB. Mutant larval zebrafish  
653 experiments were performed on siblings from heterozygous in-crosses, differing only in the  
654 mutation of the specific gene and genotyped at the end of the experiment.

655 *Dark Pulse Experiments:*

656 Larvae are placed in the behavior tracking boxes, 2 or 3 dark pulses for 10 minutes with a 2-4  
657 hour interval were introduced in four independent experiments. For data analysis, only the dark  
658 pulses after the acclimatization period in the late afternoon were combined for each genotype.

659 *In situ hybridization*

660 RNA in situ hybridization (ISH) to detect *c-fos* and galanin was performed as described (Thisse  
661 and Thisse, 2008). Zebrafish larvae were fixed in 4% paraformaldehyde in PBS at 4°C  
662 overnight. A template for *in vitro* transcription was generated by PCR using a reverse primer  
663 that contains a T7 promoter sequence 5'-TAATACGACTCACTATAGGG-3' from cDNA. A  
664 digoxigenin (DIG)-labelled antisense RNA probe was synthesized using the DIG labelling kit  
665 (Roche) and T7 RNA polymerase according to the manufacturer's recommendations. The  
666 probe was detected with anti-DIG-AP antibody (1:2,000, Roche) and nitro-blue tetrazolium  
667 chloride (NBT)/5-bromo-4-chloro-3'-indolyphosphate (BCIP) substrate (Roche) according to  
668 published protocols. To detect the differences in expression between the mutant backgrounds  
669 and WTs after  $A\beta^{\text{short}}$  and  $A\beta^{\text{long}}$  injection, larvae were incubated and washed in the same  
670 tubes throughout the ISH procedure to avoid staining artefacts. To do this, larvae from  
671 different genotypes were marked by cutting the tail to allow identification after ISH. The  
672 brains were exposed by dissection, keeping the brain and spinal cord intact. Embryos were  
673 stored in 60% glycerol/PBS for imaging.

674

675 *Baseline c-fos ISH:*

676 Zebrafish larval siblings were kept in 14:10 day/night normal or reverse-cycle incubators. 50  
677 larvae were collected at each time point (ZT1, ZT13, and ZT19) and fixed in 4%  
678 paraformaldehyde in PBS overnight. RNA in situ hybridization (ISH) to detect *c-fos* was  
679 performed as described (Thisse and Thisse, 2008).

680

### 681 *KASP genotyping*

682 For rapid genotyping of mutant zebrafish harbouring the *adrb2a* $\Delta$ 8 and *pgrmc1* $\Delta$ 16 alleles, a  
683 mutant allele-specific forward primer, a wild-type allele-specific forward primer and a  
684 common reverse primer were used (LGC Genomics). The primer sequences were targeted  
685 against the following;

686

#### 687 *adrb2a*

688 5' TTTTACTACTTACTGTTTGCACAAACCTATGTTAACTGTGTTAACGTGTTTTCTTCT  
689 GCTTTTCTTTCTTGATCTCTGTCAGGTCATGGGAAACATAAGGTCCTCAATACC[CGA  
690 AGATC/-]TTATCTGTCCAAACAATACTAATGCCTCCACCAAAGCGAACTACAGATG  
691 ACAGTGCTGGGCACACTCATGTCCATTCTTGCTTGATCATCGTCTTTGGCAATGTGA  
692 TGGTGATTACAGCCA-3'

693

#### 694 *pgrmc1*:

695 5' ATGGCTGAAGAAGCAGTCGAGCAAACCTTCTGGAATCCTTCAGGAAATTTTCACGT  
696 CGCCACTGAACATCAGTTTGCTATGTCTTTGTTTGTTCCTACTTTACAAAATCATCCG  
697 CGGAGACAAGCC[TGCAGACTATGGCCCG/-]GYTGAGGAGCCGCTGCCCAAACCT

698 CAAGAAAAGAGATTTYACTTTAGCAGATCTGCAAGAGTACGATGGACTGAAAAACC  
699 CAAGAATCCTGATGGCTGTCAACGGG-3'

700

701 where [x/-] indicates the indel difference in [WT/mutant]. PCR amplification was performed  
702 using KASP Master mix (LGC Genomics) according to the manufacturer's instructions.

703 Fluorescence was read on a CFX96 Touch Real-Time PCR Detection System (Bio-Rad) and  
704 the allelic discrimination plot generated using Bio-Rad CFX Manager Software.

705

#### 706 *Time lapse confocal microscopy*

707 Three Casper larvae at 5 dpf were mounted dorsally on a slide in 1.5% agarose. 10 nl of A $\beta$ 42-  
708 Hi488 was intra-cardiac injected to embryos, control fish were untreated. Fish were imaged for 6  
709 min taking 2  $\mu$ m thick stacks through the whole brain using a confocal microscope (Leica SP8).  
710 Each fish was imaged every 20 mins for 8 hours.

#### 711 *pERK/tERK staining and activity Mapping*

712 Larvae were fixed overnight at 4°C in 4% paraformaldehyde (PFA) and 4% sucrose in PBS;  
713 permeabilized 45 min in 0.05% trypsin-EDTA on ice; blocked 6 hr at room temperature (RT) in  
714 phosphate buffered saline plus 0.05% Triton (PBT) plus 2% normal goat serum, 1% BSA, and  
715 1% DMSO; and then incubated over sequential nights at 4°C in primary antibodies (Cell  
716 Signaling Technology 4370 and 4696; 1:500) and secondary antibodies conjugated with Alexa  
717 fluorophores (Life Technologies; 1:200) in PBT plus 1% BSA and 1% DMSO.

718 Larvae were mounted in 1.5% low melt agarose and imaged with a custom two-photon  
719 microscope (Bruker; Prairie View software) with a 203 water immersion objective (Olympus).  
720 Images were noise filtered using a custom MATLAB (The MathWorks) scripts and registered  
721 into Z-Brain using the Computational Morphometry Toolkit  
722 (<http://www.nitrc.org/projects/cmtk/>) with the command string: -a -w -r 0102 -l af -X 52 -C 8 -G  
723 80 -R 3 -A "-accuracy 0.4 -auto-multi-levels 4" -W "-accuracy 1.6" -T 4. Registered images  
724 were prepared using a custom MATLAB/MIJ (<http://bigwww.epfl.ch/sage/soft/mij/>) script to  
725 downsize, blur, and adjust the maximum brightness of each stack to the top 0.1% of pixel  
726 intensities to preserve dynamic range. Activity maps were generated using MATLAB  
727 scripts(Randlett et al., 2015).

#### 728 *Crispr/Cas9 mutant generation*

729 The CRISPR design tool CHOPCHOP (<http://chopchop.cbu.uib.no>) was used to identify a target  
730 region in zebrafish *adrb2a* and *pgrmc1* (Labun et al., 2019). The gene specific oligomers were  
731 ordered from Thermofisher including the 5' and 3' tags:

732 For *adrb2a*:

733 5' ATTTAGGTGACACTATAGTTTGGACAGATAAGATCTTGT TTTAGAGCTAGAAATAG

734 CAAG-3'

735 For *pgrmc1*:

736 5' ATTTAGGTGACACTATATGCAGACTATGGCCCGGTTGGTT TTTAGAGCTAGAAATAG

737 CAAG-3'

738 Constant oligomer:

739 5'AAAAGCACCGACTCGGTGCCACTTTTTCAAGTTGATAACGGACTAGCCTTATTTTA  
740 ACTTGCTATTTCT AGCTCTAAAAC-3'

741 The constant oligomer and the gene specific oligomer were annealed on a PCR machine and  
742 filled in using T4 DNA polymerase (NEB) (Gagnon et al., 2014). The template was cleaned up  
743 using a PCR clean-up column (Qiaquick) and the product was verified on a 2% agarose gel. The  
744 sgRNA was transcribed from this DNA template using Ambion MEGAscript SP6 kit (Gagnon et  
745 al., 2014). Cas9 mRNA and the purified sgRNA were co-injected into one-cell stage embryos at  
746 a concentration of 200 ng and 100 ng per embryo, respectively.

747

748 *Caspase-3 staining*

749 5dpf larvae that were injected with A $\beta$  oligomers or soaked in Camptothecin (1 $\mu$ M; Sigma  
750 Aldrich) were fixed 5 hours after injection/drug treatment in 4% PFA and kept overnight at 4°C.  
751 Brains were dissected and dehydrated next day and were washed 3 times in PDT buffer  
752 (0.3 Triton-X in PBST with 1% DMSO) and incubated with Caspase-3 antibody (1:500; BD  
753 Biosciences) at 4°C. The brains were incubated with Alexa Fluor 568 goat anti-rabbit antibody  
754 (1:200; Invitrogen) next day at 4°C overnight and imaged using a confocal microscope.

755 *Statistical Analyses*

756 For data analyses we used a Gardner-Altman estimation plot, which visualizes the effect size and  
757 displays an experimental dataset's complete statistical information (Ho et al., 2019). The  
758 bootstrapped 95% confidence interval (CI) was calculated from 10,000 bootstrapped resamples  
759 (Ho et al., 2019).

760 Details of statistics used in each panel are also described in the figure legend. For multiple  
761 comparisons, data was first tested for normality by the Kogloromov-Smirnov (KS) statistic and  
762 extreme outliers were discarded by Grubb's test ( $p \leq 0.01$ ). Those that violated normality were  
763 analysed with the non-parametric Kruskal-Wallis test, with either Tukey-Kramer or Bonferonni  
764 post hoc testing; otherwise, data was analysed with one-way ANOVA followed by Tukey's post-  
765 hoc testing. For dose response curves, a two-way ANOVA was performed to test the interaction  
766 effects between preparation type and dose. For return to baseline statistics, paired t-tests were  
767 performed. Survival curves were analysed with Kaplan-Meier log rank test. All statistical tests  
768 and graphs were generated in MATLAB (R2015a) loaded with the Statistical Toolbox. Injection  
769 and tracking experiments were performed blinded.

#### 770 REFERENCES:

771 Allen, S.R., Seiler, W.O., Stahelin, H.B., and Spiegel, R. (1987). Seventy-two hour polygraphic  
772 and behavioral recordings of wakefulness and sleep in a hospital geriatric unit: comparison  
773 between demented and nondemented patients. *Sleep* 10, 143-159.

774 Amrhein, V., Greenland, S., and McShane, B. (2019). Scientists rise up against statistical  
775 significance. *Nature* 567, 305-307.

776 Ashlin, T.G., Blunsom, N.J., Ghosh, M., Cockcroft, S., and Rihel, J. (2018). *Pitpnc1* a Regulates  
777 Zebrafish Sleep and Wake Behavior through Modulation of Insulin-like Growth Factor  
778 Signaling. *Cell Rep* 24, 1389-1396.

779 Baraban, S.C., Taylor, M.R., Castro, P.A., and Baier, H. (2005). Pentylentetrazole induced  
780 changes in zebrafish behavior, neural activity and c-fos expression. *Neuroscience* 131, 759-768.



- 781 Barlow, I.L., and Rihel, J. (2017). Zebrafish sleep: from geneZZZ to neuronZZZ. *Curr Opin*  
782 *Neurobiol* 44, 65-71.
- 783 Bateman, R.J., Wen, G., Morris, J.C., and Holtzman, D.M. (2007). Fluctuations of CSF amyloid-  
784 beta levels: implications for a diagnostic and therapeutic biomarker. *Neurology* 68, 666-669.
- 785 Benilova, I., Karran, E., and De Strooper, B. (2012). The toxic Abeta oligomer and Alzheimer's  
786 disease: an emperor in need of clothes. *Nat Neurosci* 15, 349-357.
- 787 Cirrito, J.R., Yamada, K.A., Finn, M.B., Sloviter, R.S., Bales, K.R., May, P.C., Schoepp, D.D.,  
788 Paul, S.M., Mennerick, S., and Holtzman, D.M. (2005). Synaptic activity regulates interstitial  
789 fluid amyloid-beta levels in vivo. *Neuron* 48, 913-922.
- 790 Cotto, E., Andre, M., Forgue, J., Fleury, H.J., and Babin, P.J. (2005). Molecular characterization,  
791 phylogenetic relationships, and developmental expression patterns of prion genes in zebrafish  
792 (*Danio rerio*). *Febs j* 272, 500-513.
- 793 De, S., Wirthensohn, D.C., Flagmeier, P., Hughes, C., Aprile, F.A., Ruggeri, F.S., Whiten, D.R.,  
794 Emin, D., Xia, Z., Varela, J.A., *et al.* (2019). Different soluble aggregates of Abeta42 can give  
795 rise to cellular toxicity through different mechanisms. *Nat Commun* 10, 1541.
- 796 Eimer, W.A., Vijaya Kumar, D.K., Navalpur Shanmugam, N.K., Rodriguez, A.S., Mitchell, T.,  
797 Washicosky, K.J., Gyorgy, B., Breakefield, X.O., Tanzi, R.E., and Moir, R.D. (2018).  
798 Alzheimer's Disease-Associated beta-Amyloid Is Rapidly Seeded by Herpesviridae to Protect  
799 against Brain Infection. *Neuron* 100, 1527-1532.

800 Fleisch, V.C., Leighton, P.L., Wang, H., Pillay, L.M., Ritzel, R.G., Bhinder, G., Roy, B.,  
801 Tierney, K.B., Ali, D.W., Waskiewicz, A.J., *et al.* (2013). Targeted mutation of the gene  
802 encoding prion protein in zebrafish reveals a conserved role in neuron excitability. *Neurobiol Dis*  
803 *55*, 11-25.

804 Fronczek, R., van Geest, S., Frolich, M., Overeem, S., Roelandse, F.W., Lammers, G.J., and  
805 Swaab, D.F. (2012). Hypocretin (orexin) loss in Alzheimer's disease. *Neurobiol Aging* *33*, 1642-  
806 1650.

807 Gagnon, J.A., Valen, E., Thyme, S.B., Huang, P., Akhmetova, L., Pauli, A., Montague, T.G.,  
808 Zimmerman, S., Richter, C., and Schier, A.F. (2014). Efficient mutagenesis by Cas9 protein-  
809 mediated oligonucleotide insertion and large-scale assessment of single-guide RNAs. *PLoS One*  
810 *9*, e98186.

811 Ghavami, M., Rezaei, M., Ejtehadi, R., Lotfi, M., Shokrgozar, M.A., Abd Emamy, B., Raush, J.,  
812 and Mahmoudi, M. (2013). Physiological temperature has a crucial role in amyloid beta in the  
813 absence and presence of hydrophobic and hydrophilic nanoparticles. *ACS Chem Neurosci* *4*,  
814 375-378.

815 Gimbel, D.A., Nygaard, H.B., Coffey, E.E., Gunther, E.C., Lauren, J., Gimbel, Z.A., and  
816 Strittmatter, S.M. (2010). Memory impairment in transgenic Alzheimer mice requires cellular  
817 prion protein. *J Neurosci* *30*, 6367-6374.

818 Ho, J., Tumkaya, T., Aryal, S., Choi, H., and Claridge-Chang, A. (2019). Moving beyond P  
819 values: data analysis with estimation graphics. *Nat Methods* *16*, 565-566.

- 820 Imeri, L., and Opp, M.R. (2009). How (and why) the immune system makes us sleep. *Nat Rev*  
821 *Neurosci 10*, 199-210.
- 822 Irizarry, M.C., McNamara, M., Fedorchak, K., Hsiao, K., and Hyman, B.T. (1997). APPSw  
823 transgenic mice develop age-related A beta deposits and neuropil abnormalities, but no neuronal  
824 loss in CA1. *J Neuropathol Exp Neurol 56*, 965-973.
- 825 Izzo, N.J., Staniszewski, A., To, L., Fa, M., Teich, A.F., Saeed, F., Wostein, H., Walko, T., 3rd,  
826 Vaswani, A., Wardius, M., *et al.* (2014a). Alzheimer's therapeutics targeting amyloid beta 1-42  
827 oligomers I: Abeta 42 oligomer binding to specific neuronal receptors is displaced by drug  
828 candidates that improve cognitive deficits. *PLoS One 9*, e111898.
- 829 Izzo, N.J., Xu, J., Zeng, C., Kirk, M.J., Mozzoni, K., Silky, C., Rehak, C., Yurko, R., Look, G.,  
830 Rishton, G., *et al.* (2014b). Alzheimer's therapeutics targeting amyloid beta 1-42 oligomers II:  
831 Sigma-2/PGRMC1 receptors mediate Abeta 42 oligomer binding and synaptotoxicity. *PLoS One*  
832 *9*, e111899.
- 833 Jack, C.R., Jr., Knopman, D.S., Jagust, W.J., Petersen, R.C., Weiner, M.W., Aisen, P.S., Shaw,  
834 L.M., Vemuri, P., Wiste, H.J., Weigand, S.D., *et al.* (2013). Tracking pathophysiological  
835 processes in Alzheimer's disease: an updated hypothetical model of dynamic biomarkers. *Lancet*  
836 *Neurol 12*, 207-216.
- 837 Jarosz-Griffiths, H.H., Noble, E., Rushworth, J.V., and Hooper, N.M. (2016). Amyloid-beta  
838 Receptors: The Good, the Bad, and the Prion Protein. *J Biol Chem 291*, 3174-3183.
- 839 Kamenetz, F., Tomita, T., Hsieh, H., Seabrook, G., Borchelt, D., Iwatsubo, T., Sisodia, S., and  
840 Malinow, R. (2003). APP processing and synaptic function. *Neuron 37*, 925-937.

841 Kang, J.E., Lim, M.M., Bateman, R.J., Lee, J.J., Smyth, L.P., Cirrito, J.R., Fujiki, N., Nishino,  
842 S., and Holtzman, D.M. (2009). Amyloid-beta dynamics are regulated by orexin and the sleep-  
843 wake cycle. *Science* 326, 1005-1007.

844 Kokel, D., Bryan, J., Laggner, C., White, R., Cheung, C.Y., Mateus, R., Healey, D., Kim, S.,  
845 Werdich, A.A., Haggarty, S.J., *et al.* (2010). Rapid behavior-based identification of neuroactive  
846 small molecules in the zebrafish. *Nat Chem Biol* 6, 231-237.

847 Kostylev, M.A., Kaufman, A.C., Nygaard, H.B., Patel, P., Haas, L.T., Gunther, E.C., Vortmeyer,  
848 A., and Strittmatter, S.M. (2015). Prion-Protein-interacting Amyloid-beta Oligomers of High  
849 Molecular Weight Are Tightly Correlated with Memory Impairment in Multiple Alzheimer  
850 Mouse Models. *J Biol Chem* 290, 17415-17438.

851 Kumar, D.K., Choi, S.H., Washicosky, K.J., Eimer, W.A., Tucker, S., Ghofrani, J., Lefkowitz,  
852 A., McColl, G., Goldstein, L.E., Tanzi, R.E., *et al.* (2016). Amyloid-beta peptide protects against  
853 microbial infection in mouse and worm models of Alzheimer's disease. *Sci Transl Med* 8,  
854 340ra372.

855 Kusumoto, Y., Lomakin, A., Teplow, D.B., and Benedek, G.B. (1998). Temperature dependence  
856 of amyloid beta-protein fibrillization. *Proc Natl Acad Sci U S A* 95, 12277-12282.

857 Labun, K., Montague, T.G., Krause, M., Torres Cleuren, Y.N., Tjeldnes, H., and Valen, E.  
858 (2019). CHOPCHOP v3: expanding the CRISPR web toolbox beyond genome editing. *Nucleic  
859 Acids Res* 47, W171-w174.

860 Lauren, J., Gimbel, D.A., Nygaard, H.B., Gilbert, J.W., and Strittmatter, S.M. (2009). Cellular  
861 prion protein mediates impairment of synaptic plasticity by amyloid-beta oligomers. *Nature* 457,  
862 1128-1132.

863 Leighton, P.L.A., Kanyo, R., Neil, G.J., Pollock, N.M., and Allison, W.T. (2018). Prion gene  
864 paralogs are dispensable for early zebrafish development and have nonadditive roles in seizure  
865 susceptibility. *J Biol Chem* 293, 12576-12592.

866 Lesne, S.E., Sherman, M.A., Grant, M., Kuskowski, M., Schneider, J.A., Bennett, D.A., and  
867 Ashe, K.H. (2013). Brain amyloid-beta oligomers in ageing and Alzheimer's disease. *Brain* 136,  
868 1383-1398.

869 Lim, A.S., Ellison, B.A., Wang, J.L., Yu, L., Schneider, J.A., Buchman, A.S., Bennett, D.A., and  
870 Saper, C.B. (2014). Sleep is related to neuron numbers in the ventrolateral preoptic/intermediate  
871 nucleus in older adults with and without Alzheimer's disease. *Brain* 137, 2847-2861.

872 Loewenstein, R.J., Weingartner, H., Gillin, J.C., Kaye, W., Ebert, M., and Mendelson, W.B.  
873 (1982). Disturbances of sleep and cognitive functioning in patients with dementia. *Neurobiol*  
874 *Aging* 3, 371-377.

875 Malaga-Trillo, E., Solis, G.P., Schrock, Y., Geiss, C., Luncz, L., Thomanetz, V., and Stuermer,  
876 C.A. (2009). Regulation of embryonic cell adhesion by the prion protein. *PLoS Biol* 7, e55.

877 Manaye, K.F., Mouton, P.R., Xu, G., Drew, A., Lei, D.L., Sharma, Y., Rebeck, G.W., and  
878 Turner, S. (2013). Age-related loss of noradrenergic neurons in the brains of triple transgenic  
879 mice. *Age (Dordr)* 35, 139-147.

- 880 Moir, R.D., and Tanzi, R.E. (2019). Low Evolutionary Selection Pressure in Senescence Does  
881 Not Explain the Persistence of Aβ in the Vertebrate Genome. *Front Aging Neurosci* *11*, 70.
- 882 Moran, M., Lynch, C.A., Walsh, C., Coen, R., Coakley, D., and Lawlor, B.A. (2005). Sleep  
883 disturbance in mild to moderate Alzheimer's disease. *Sleep Med* *6*, 347-352.
- 884 Newman, M., Ebrahimie, E., and Lardelli, M. (2014). Using the zebrafish model for Alzheimer's  
885 disease research. *Front Genet* *5*, 189.
- 886 Nicoll, A.J., Panico, S., Freir, D.B., Wright, D., Terry, C., Risse, E., Herron, C.E., O'Malley, T.,  
887 Wadsworth, J.D., Farrow, M.A., *et al.* (2013). Amyloid-beta nanotubes are associated with prion  
888 protein-dependent synaptotoxicity. *Nat Commun* *4*, 2416.
- 889 Nygaard, H.B., van Dyck, C.H., and Strittmatter, S.M. (2014). Fyn kinase inhibition as a novel  
890 therapy for Alzheimer's disease. *Alzheimers Res Ther* *6*, 8.
- 891 O'Brien, R.J., and Wong, P.C. (2011). Amyloid precursor protein processing and Alzheimer's  
892 disease. *Annu Rev Neurosci* *34*, 185-204.
- 893 Orban, G., Volgyi, K., Juhasz, G., Penke, B., Kekesi, K.A., Kardos, J., and Czurko, A. (2010).  
894 Different electrophysiological actions of 24- and 72-hour aggregated amyloid-beta oligomers on  
895 hippocampal field population spike in both anesthetized and awake rats. *Brain Res* *1354*, 227-  
896 235.
- 897 Prinz, P.N., Vitaliano, P.P., Vitiello, M.V., Bokan, J., Raskind, M., Peskind, E., and Gerber, C.  
898 (1982). Sleep, EEG and mental function changes in senile dementia of the Alzheimer's type.  
899 *Neurobiol Aging* *3*, 361-370.

900 Prober, D.A., Rihel, J., Onah, A.A., Sung, R.J., and Schier, A.F. (2006). Hypocretin/orexin  
901 overexpression induces an insomnia-like phenotype in zebrafish. *J Neurosci* 26, 13400-13410.

902 Randlett, O., Wee, C.L., Naumann, E.A., Nnaemeka, O., Schoppik, D., Fitzgerald, J.E.,  
903 Portugues, R., Lacoste, A.M., Riegler, C., Engert, F., *et al.* (2015). Whole-brain activity mapping  
904 onto a zebrafish brain atlas. *Nat Methods* 12, 1039-1046.

905 Rihel, J., Prober, D.A., Arvanites, A., Lam, K., Zimmerman, S., Jang, S., Haggarty, S.J., Kokel,  
906 D., Rubin, L.L., Peterson, R.T., *et al.* (2010). Zebrafish behavioral profiling links drugs to  
907 biological targets and rest/wake regulation. *Science* 327, 348-351.

908 Risse, E., Nicoll, A.J., Taylor, W.A., Wright, D., Badoni, M., Yang, X., Farrow, M.A., and  
909 Collinge, J. (2015). Identification of a Compound That Disrupts Binding of Amyloid-beta to the  
910 Prion Protein Using a Novel Fluorescence-based Assay. *J Biol Chem* 290, 17020-17028.

911 Roh, J.H., Huang, Y., Bero, A.W., Kasten, T., Stewart, F.R., Bateman, R.J., and Holtzman, D.M.  
912 (2012). Disruption of the sleep-wake cycle and diurnal fluctuation of beta-amyloid in mice with  
913 Alzheimer's disease pathology. *Sci Transl Med* 4, 150ra122.

914 Roy, S.J., Glazkova, I., Frechette, L., Iorio-Morin, C., Binda, C., Petrin, D., Trieu, P., Robitaille,  
915 M., Angers, S., Hebert, T.E., *et al.* (2013). Novel, gel-free proteomics approach identifies RNF5  
916 and JAMP as modulators of GPCR stability. *Mol Endocrinol* 27, 1245-1266.

917 Shokri-Kojori, E., Wang, G.J., Wiers, C.E., Demiral, S.B., Guo, M., Kim, S.W., Lindgren, E.,  
918 Ramirez, V., Zehra, A., Freeman, C., *et al.* (2018). beta-Amyloid accumulation in the human  
919 brain after one night of sleep deprivation. *Proc Natl Acad Sci U S A* 115, 4483-4488.

920 Soscia, S.J., Kirby, J.E., Washicosky, K.J., Tucker, S.M., Ingelsson, M., Hyman, B., Burton,  
921 M.A., Goldstein, L.E., Duong, S., Tanzi, R.E., *et al.* (2010). The Alzheimer's disease-associated  
922 amyloid beta-protein is an antimicrobial peptide. *PLoS One* 5, e9505.

923 Steele, S.L., Yang, X., Debiais-Thibaud, M., Schwerte, T., Pelster, B., Ekker, M., Tiberi, M., and  
924 Perry, S.F. (2011). In vivo and in vitro assessment of cardiac beta-adrenergic receptors in larval  
925 zebrafish (*Danio rerio*). *J Exp Biol* 214, 1445-1457.

926 Sterniczuk, R., Antle, M.C., Laferla, F.M., and Dyck, R.H. (2010). Characterization of the 3xTg-  
927 AD mouse model of Alzheimer's disease: part 2. Behavioral and cognitive changes. *Brain Res*  
928 1348, 149-155.

929 Szaruga, M., Munteanu, B., Lismont, S., Veugelen, S., Horre, K., Mercken, M., Saido, T.C.,  
930 Ryan, N.S., De Vos, T., Savvides, S.N., *et al.* (2017). Alzheimer's-Causing Mutations Shift  
931 Aβ Length by Destabilizing γ-Secretase-Aβ Interactions. *Cell* 170, 443-456.e414.

932 Thisse, B., Thisse, C. (2004). Fast Release Clones: A High Throughput Expression Analysis.  
933 ZFIN Direct Data Submission (<http://zfin.org>).

934 Thisse, C., and Thisse, B. (2008). High-resolution in situ hybridization to whole-mount zebrafish  
935 embryos. *Nat Protoc* 3, 59-69.

936 Um, J.W., Kaufman, A.C., Kostylev, M., Heiss, J.K., Stagi, M., Takahashi, H., Kerrisk, M.E.,  
937 Vortmeyer, A., Wisniewski, T., Koleske, A.J., *et al.* (2013). Metabotropic glutamate receptor 5 is  
938 a coreceptor for Alzheimer abeta oligomer bound to cellular prion protein. *Neuron* 79, 887-902.



- 939 Um, J.W., Nygaard, H.B., Heiss, J.K., Kostylev, M.A., Stagi, M., Vortmeyer, A., Wisniewski,  
940 T., Gunther, E.C., and Strittmatter, S.M. (2012). Alzheimer amyloid-beta oligomer bound to  
941 postsynaptic prion protein activates Fyn to impair neurons. *Nat Neurosci* *15*, 1227-1235.
- 942 Vazquez de la Torre, A., Gay, M., Vilaprinyo-Pascual, S., Mazzucato, R., Serra-Batiste, M.,  
943 Vilaseca, M., and Carulla, N. (2018). Direct Evidence of the Presence of Cross-Linked Abeta  
944 Dimers in the Brains of Alzheimer's Disease Patients. *Anal Chem* *90*, 4552-4560.
- 945 Videnovic, A., Lazar, A.S., Barker, R.A., and Overeem, S. (2014). 'The clocks that time us'--  
946 circadian rhythms in neurodegenerative disorders. *Nat Rev Neurol* *10*, 683-693.
- 947 Wang, D., Govindaiah, G., Liu, R., De Arcangelis, V., Cox, C.L., and Xiang, Y.K. (2010).  
948 Binding of amyloid beta peptide to beta2 adrenergic receptor induces PKA-dependent AMPA  
949 receptor hyperactivity. *Faseb j* *24*, 3511-3521.
- 950 Wang, J., Ikonen, S., Gurevicius, K., van Groen, T., and Tanila, H. (2002). Alteration of cortical  
951 EEG in mice carrying mutated human APP transgene. *Brain Res* *943*, 181-190.
- 952 Wang, Z., Nishimura, Y., Shimada, Y., Umemoto, N., Hirano, M., Zang, L., Oka, T., Sakamoto,  
953 C., Kuroyanagi, J., and Tanaka, T. (2009). Zebrafish beta-adrenergic receptor mRNA expression  
954 and control of pigmentation. *Gene* *446*, 18-27.
- 955 Whitcomb, D.J., Hogg, E.L., Regan, P., Piers, T., Narayan, P., Whitehead, G., Winters, B.L.,  
956 Kim, D.H., Kim, E., St George-Hyslop, P., *et al.* (2015). Intracellular oligomeric amyloid-beta  
957 rapidly regulates GluA1 subunit of AMPA receptor in the hippocampus. *Sci Rep* *5*, 10934.

958 Xie, L., Kang, H., Xu, Q., Chen, M.J., Liao, Y., Thiyagarajan, M., O'Donnell, J., Christensen,  
959 D.J., Nicholson, C., Iliff, J.J., *et al.* (2013). Sleep drives metabolite clearance from the adult  
960 brain. *Science* 342, 373-377.

961

962

963 **Supplemental Information**

964 **Figure 1 – figure supplement 1. A $\beta$  oligomers exert dose-dependent, short-term effects on**  
965 **zebrafish sleep**

966 A) Same images from Figure 1B, highlighting the region of interest in the telencephalon for  
967 fluorescence intensity measurements in B. Anterior is to the top, dorsal view.

968 B) Heart-injected fluorescently-tagged A $\beta$  (black) penetrates the brain within 1 hr and peaks in  
969 concentration 2-3 hr post-injection. Cyan shows background fluorescence of a negative control.  
970 The shaded area shows  $\pm$  standard deviation from 3 independent injections.

971 C) Electron micrographs of A $\beta$  oligomers formed after 24 hr incubation at 4°C, 25°C, and 37°C.  
972 A $\beta^{\text{arctic}}$  was incubated at 25°C for 2 hr as a positive control. The color code is used throughout  
973 the main and supplementary figures. Scale bar = 100 nm

974 D) The A $\beta^{\text{short}}$  (blue) and A $\beta^{\text{long}}$  (green) have opposing, dose-dependent effects on average  
975 waking activity, normalized to A $\beta^{\text{rev}}$  injections. The error bars represent  $\pm$  the SEM. doseXprep  
976 interaction \* $p \leq 0.05$ , \*\*\*\* $p \leq 0.0001$  two-way ANOVA, Fisher's least significant difference post  
977 hoc test.  $p \leq 0.001$ , prep effect (plotted in F).

978 E) A $\beta^{\text{short}}$  (blue) and A $\beta^{\text{long}}$  (green) have opposing, dose-dependent effects on sleep. doseXprep  
979 interaction, two-way ANOVA, \* $p \leq 0.05$ , Fisher's least significant difference post hoc test.  
980  $p \leq 0.05$ , prep effect (plotted in G). Based on the data in D-E, 10nM was chosen as the  
981 concentration for all subsequent A $\beta$  injection experiments.

982 F) The waking activity for each larva in D, normalized to A $\beta^{\text{rev}}$  injections and plotted to  
983 emphasize the significant effect of the preparation irrespective of dose ( $p < 0.001$ , two-way  
984 ANOVA).

985 G) Sleep for each larva in E normalized to  $A\beta^{rev}$  injections and plotted to emphasize the  
986 significant effect of the preparation ( $p < 0.001$ , two-way ANOVA).  
987 H) Sleep plot of untreated WT (black), anesthetized only (red), mock injected (blue) and PBS  
988 injected (green) fish on a 14hr:10hr light:dark cycle (indicated by the white and black bars). The  
989 ribbons represent  $\pm$  the SEM.  
990 I) Sleep for each larva in H (WT (black), anesthetised only (red), mock injected (blue) and PBS  
991 injected (green)) shows that there is no statistical difference in sleep due to any of the  
992 manipulations ( $p > 0.05$ , one-way ANOVA).  
993 J) Sleep plot after vehicle injection (PBS, magenta trace) and immediate tracking compared to  
994 larvae that had acclimated to the apparatus for 24 hrs (black trace). The ribbons represent  $\pm$  the  
995 SEM. Gold stars flag significantly different timepoints ( $p < 0.05$ , repeated measures ANOVA) and  
996 were used to determine the window for calculating the evening-only effects of  $A\beta$  injections.  
997 K) Calculating  $A\beta$  injection effects across the whole day or only in the evening window (data  
998 from Figure 1) has minimal effect on the analysis of  $A\beta^{short}$  or  $A\beta^{long}$ . The only exception (red  
999 shading) is for the reduction in sleep by  $A\beta^{short}$ , due to a flooring effect.

1000

1001 **Figure 1- figure supplement 2.  $A\beta$  exposure does not increase neuronal cell death and does**  
1002 **not alter survival into adulthood.**

1003 A) Dorsal and ventral views of representative 5 dpf larval brains stained for Caspase-3 activation  
1004 (purple) to map apoptosis. Exposure to the topoisomerase inhibitor camptothecin (CPT,  $1\mu\text{M}$ ),  
1005 which induces apoptosis, serves as a positive control. DAPI stains nuclei in white for reference.  
1006 Anterior is to the left. Scale bar =  $100\mu\text{m}$

1007 B,C) Quantification of the number of Caspase-3 positive cells after exposure to 1 $\mu$ M CPT or A $\beta$   
1008 oligomer injections (n=5 brains for each condition, B-dorsal, C-ventral). Only CPT significantly  
1009 increased apoptosis relative to A $\beta^{rev}$ . ns, p>0.05, one-way ANOVA, Tukey's post-hoc test.

1010 D) Survival curves to adulthood after 5dpf injection of A $\beta$  oligomers. There are no significant  
1011 differences among survival curves, p>0.05, Kaplan-Meier log rank test.

1012

1013 **Figure 1- figure supplement 3. A $\beta$ -injected larvae recover after 24 hrs and do not exhibit**  
1014 **seizure-like or sickness behavior.**

1015 A-B) The effects of A $\beta^{short}$  (A) and A $\beta^{long}$  (B) on waking activity (top) and sleep (bottom) return  
1016 to baseline after 24hr. Shown in A and B are traces for 48 hours post-injection on a 14hr:10hr  
1017 light:dark cycle (indicated by the white and black bars). The ribbons represent  $\pm$  the SEM.

1018 Plotted on the right are the percent change induced by A $\beta$  relative to A $\beta^{rev}$  for day 1 versus day  
1019 2, demonstrating that these parameters return to baseline (\*p $\leq$ 0.01, paired t-test). Each line  
1020 represents a single larva, the thicker line represents the mean  $\pm$  SEM.

1021 C) Activity traces of A $\beta^{short}$  (blue), A $\beta^{long}$  (green), and A $\beta^{rev}$  (black) during and after a ten minute  
1022 dark pulse are indistinguishable. Traces are for a 10 min:10min:10 min light:dark:light window  
1023 (indicated by the white and black bars). The ribbons represent  $\pm$  the SEM.

1024 D) The effects of A $\beta^{rev}$  (black), convulsant PTZ (10 mM, orange), A $\beta^{short}$  (blue), and A $\beta^{long}$   
1025 (green) on sub-second larval bout structures. Shown are delta pixel movement of one  
1026 representative larva in each group for  $\sim$ 1 min (see Figure 1-video 1). Unlike PTZ treated larvae,  
1027 A $\beta$  injected larvae have normal bout structures. Representative larvae were chosen to also  
1028 highlight that, while overall A $\beta^{long}$  injected larvae are less active, individual animals can have

1029 sustained periods of heightened activity. Similarly, individual  $A\beta^{\text{short}}$  injected animals can exhibit  
1030 periods of relatively dampened activity.

1031 E) The effects of  $A\beta^{\text{rev}}$  (black), convulsant PTZ (10 mM, orange),  $A\beta^{\text{short}}$  (blue) and  $A\beta^{\text{long}}$   
1032 (green) on high frequency bouts (HFB) in a 5 minute interval. Each dot represents a single larva.  
1033 PTZ induced HFB's is non-existent or very rare in the other groups (n=24 for all groups).

1034

1035 **Figure 3- figure supplement 1. Crispr/Cas9 targeting of zebrafish *adrb2a* and *pgrmc1***

1036 A) Human PGRMC1 and zebrafish *Pgrmc1* contain a conserved Transmembrane (TM) domain  
1037 (yellow) and a Cytochrome b5-like Heme/Steroid binding domain (blue).

1038 B) Protein alignment of zebrafish *Pgrmc1* to human PGRMC1. Identical residues are marked in  
1039 black, similar residues in grey.

1040 C) Crispr-Cas9 targeting of *pgrmc1* generated an allele with a 16bp deletion. The PAM sequence  
1041 is indicated in red.

1042 D) The predicted translation of *pgrmc1*  $\Delta 16$  leads to a premature stop codon.

1043 E) Protein alignment of zebrafish *Adrb2a* and *Adrb2b* to human ADRB2. Identical residues are  
1044 marked in black, similar residues in grey. The N-terminal region (pink) is the putative  $A\beta$   
1045 binding region. The C-terminal region is in green.

1046 F) Crispr-Cas9 targeting of *adrb2a* generated an allele with an 8bp deletion. The PAM sequence  
1047 is indicated in red.

1048 G) The predicted translation of *adrb2a* $\Delta 8$  leads to a premature stop codon lacking all functional  
1049 domains.

1050

1051 **Figure 3- figure supplement 2. *adrb2a* and *pgrmc1* mutations have small effects on baseline**  
1052 **sleep:wake parameters.**

1053 A-C') Sleep and waking activity plots for larvae from *pgrmc1*<sup>+/-</sup> in-crosses. A,A') show  
1054 representative 48hr traces for the indicated genotypes. The ribbon represents ± SEM. B-C')  
1055 Sleep and waking activity for each larva for all genotypes are plotted. The error bars represent  
1056 the mean ± SEM. There is a trend to decreased waking activity in *pgrmc1*<sup>-/-</sup> mutants compared to  
1057 wild type siblings. p=0.07, Kruskal-Wallis, Tukey-Kramer post-hoc.  
1058 D-F') Sleep and waking activity plots for larvae from *adrb2a*<sup>+/-</sup> in-crosses. D,D') show 48 hr  
1059 traces for all three genotypes. The ribbon represents ± SEM. E-F') Sleep and waking activity for  
1060 the day and night are plotted for each larva. The error bars represent the mean ± SEM. Compared  
1061 to both wild type and heterozygous siblings, *adrb2a*<sup>-/-</sup> mutants have increased sleep during the  
1062 day. \*p≤0.05, Kruskal-Wallis, Tukey-Kramer post-hoc.

1063

1064 **Figure 4- figure supplement 1. Relationship among zebrafish *prp* genes with Aβ binding**  
1065 **sites**

1066 A) Schematic comparing zebrafish Prp1-3 proteins to human PrP. SP, signal peptide (dark grey);  
1067 R, repetitive region (blue); HD, hydrophobic domain (yellow); N, glycosylation sites (black  
1068 lines); GPI anchor residue (triangle); hydrophobic tail (coral). Aβ oligomer binding regions are  
1069 shown in red. Breakpoints at repetitive regions indicate length variation. Adapted from (Cotto et  
1070 al., 2005).

1071 B) Protein alignments of zebrafish Prp1, Prp2, and Prp3 proteins to human and mouse PrP  
1072 proteins. Identical residues are marked in black, similar residues in grey. Aβ oligomer binding

1073 sites are indicated in red. The site of truncation mutations in *prp1* and *prp2* mutants are indicated  
1074 with a triangle.

1075

1076 **Figure 4- figure supplement 2. *prp* double mutants do not affect baseline sleep or wake**  
1077 **across the day:night cycle.**

1078 A-C') Sleep and waking activity plots for larvae from *prp1*<sup>+/-</sup>; *prp2*<sup>+/-</sup> in-crosses. A, A') show  
1079 representative 48hr traces for the indicated genotypes. The ribbon represents ± SEM. B-C')

1080 Sleep and waking activity for each larva for all genotypes are plotted. The error bars represent  
1081 the mean ± SEM.

1082 D-F') Sleep and waking activity plots for larvae from *prp1*<sup>+/-</sup>; *prp2*<sup>-/-</sup> in-crosses. D, D') show 48  
1083 hr traces for all three genotypes. The ribbon represents ± SEM. E-F') Sleep and waking activity

1084 for the day and night are plotted for each larva. The error bars represent the mean ± SEM.

1085

1086 **Figure 6-figure supplement 1. Pharmacological blockade of the AB<sup>long</sup>-Prp-MgluR5-Fyn**  
1087 **Kinase signalling cascade prevents reductions in waking activity**

1088 A) Representative traces of waking activity after Aβ<sup>long</sup> versus Aβ<sup>rev</sup> injections in wild type  
1089 larvae in the absence (left) or presence (right) of the Aβ-Prp binding disruptor, Chicago Sky Blue  
1090 (3nM). The data are from the same injections as in Figures 6B. Ribbons represent ± SEM. Light  
1091 and dark bars indicate the lights ON and lights OFF periods, respectively.

1092 B) The change in normalized waking activity induced by Aβ<sup>long</sup> versus Aβ<sup>rev</sup> control injections in  
1093 the absence or presence of 3nM Chicago Sky Blue. Each dot represents a single larva and error  
1094 bars indicate ± SEM. The mean difference effect size and 95% confidence interval is plotted at



1095 the bottom. N= the number of larvae in each group. \*\* $p \leq 0.01$ , Kruskal-Wallis, Tukey-Kramer  
1096 post hoc.

1097 C) Representative traces of sleep behavior after  $A\beta^{long}$  versus  $A\beta^{rev}$  injections (left) in the  
1098 presence of the mGluR5 inhibitor, MPEP (5  $\mu$ M) and (right) Src-kinase inhibitor, saracatinib  
1099 (300nM). Ribbons represent  $\pm$  SEM. The data are from the same injections as in Fig. 6D.

1100 D) The change in sleep induced by  $A\beta^{long}$  relative to  $A\beta^{rev}$  control injections in the presence of  
1101 MPEP (5  $\mu$ M) and (300nM) saracatinib. \* $p \leq 0.05$ , \*\* $p \leq 0.01$ , Kruskal-Wallis, Tukey-Kramer post  
1102 hoc.

1103 **Figure 2- source data 1. MAP-Mapping of brain areas that are significantly up- and down-**  
1104 **regulated in P-ERK levels in response to  $A\beta^{short}$**

1105 **Figure 2- source data 2. MAP-Mapping of brain areas that are significantly up- and down-**  
1106 **regulated in P-ERK levels in response to  $A\beta^{short}$**

1107 **Figure 1- video 1.  $A\beta$  does not induce seizures.**

1108

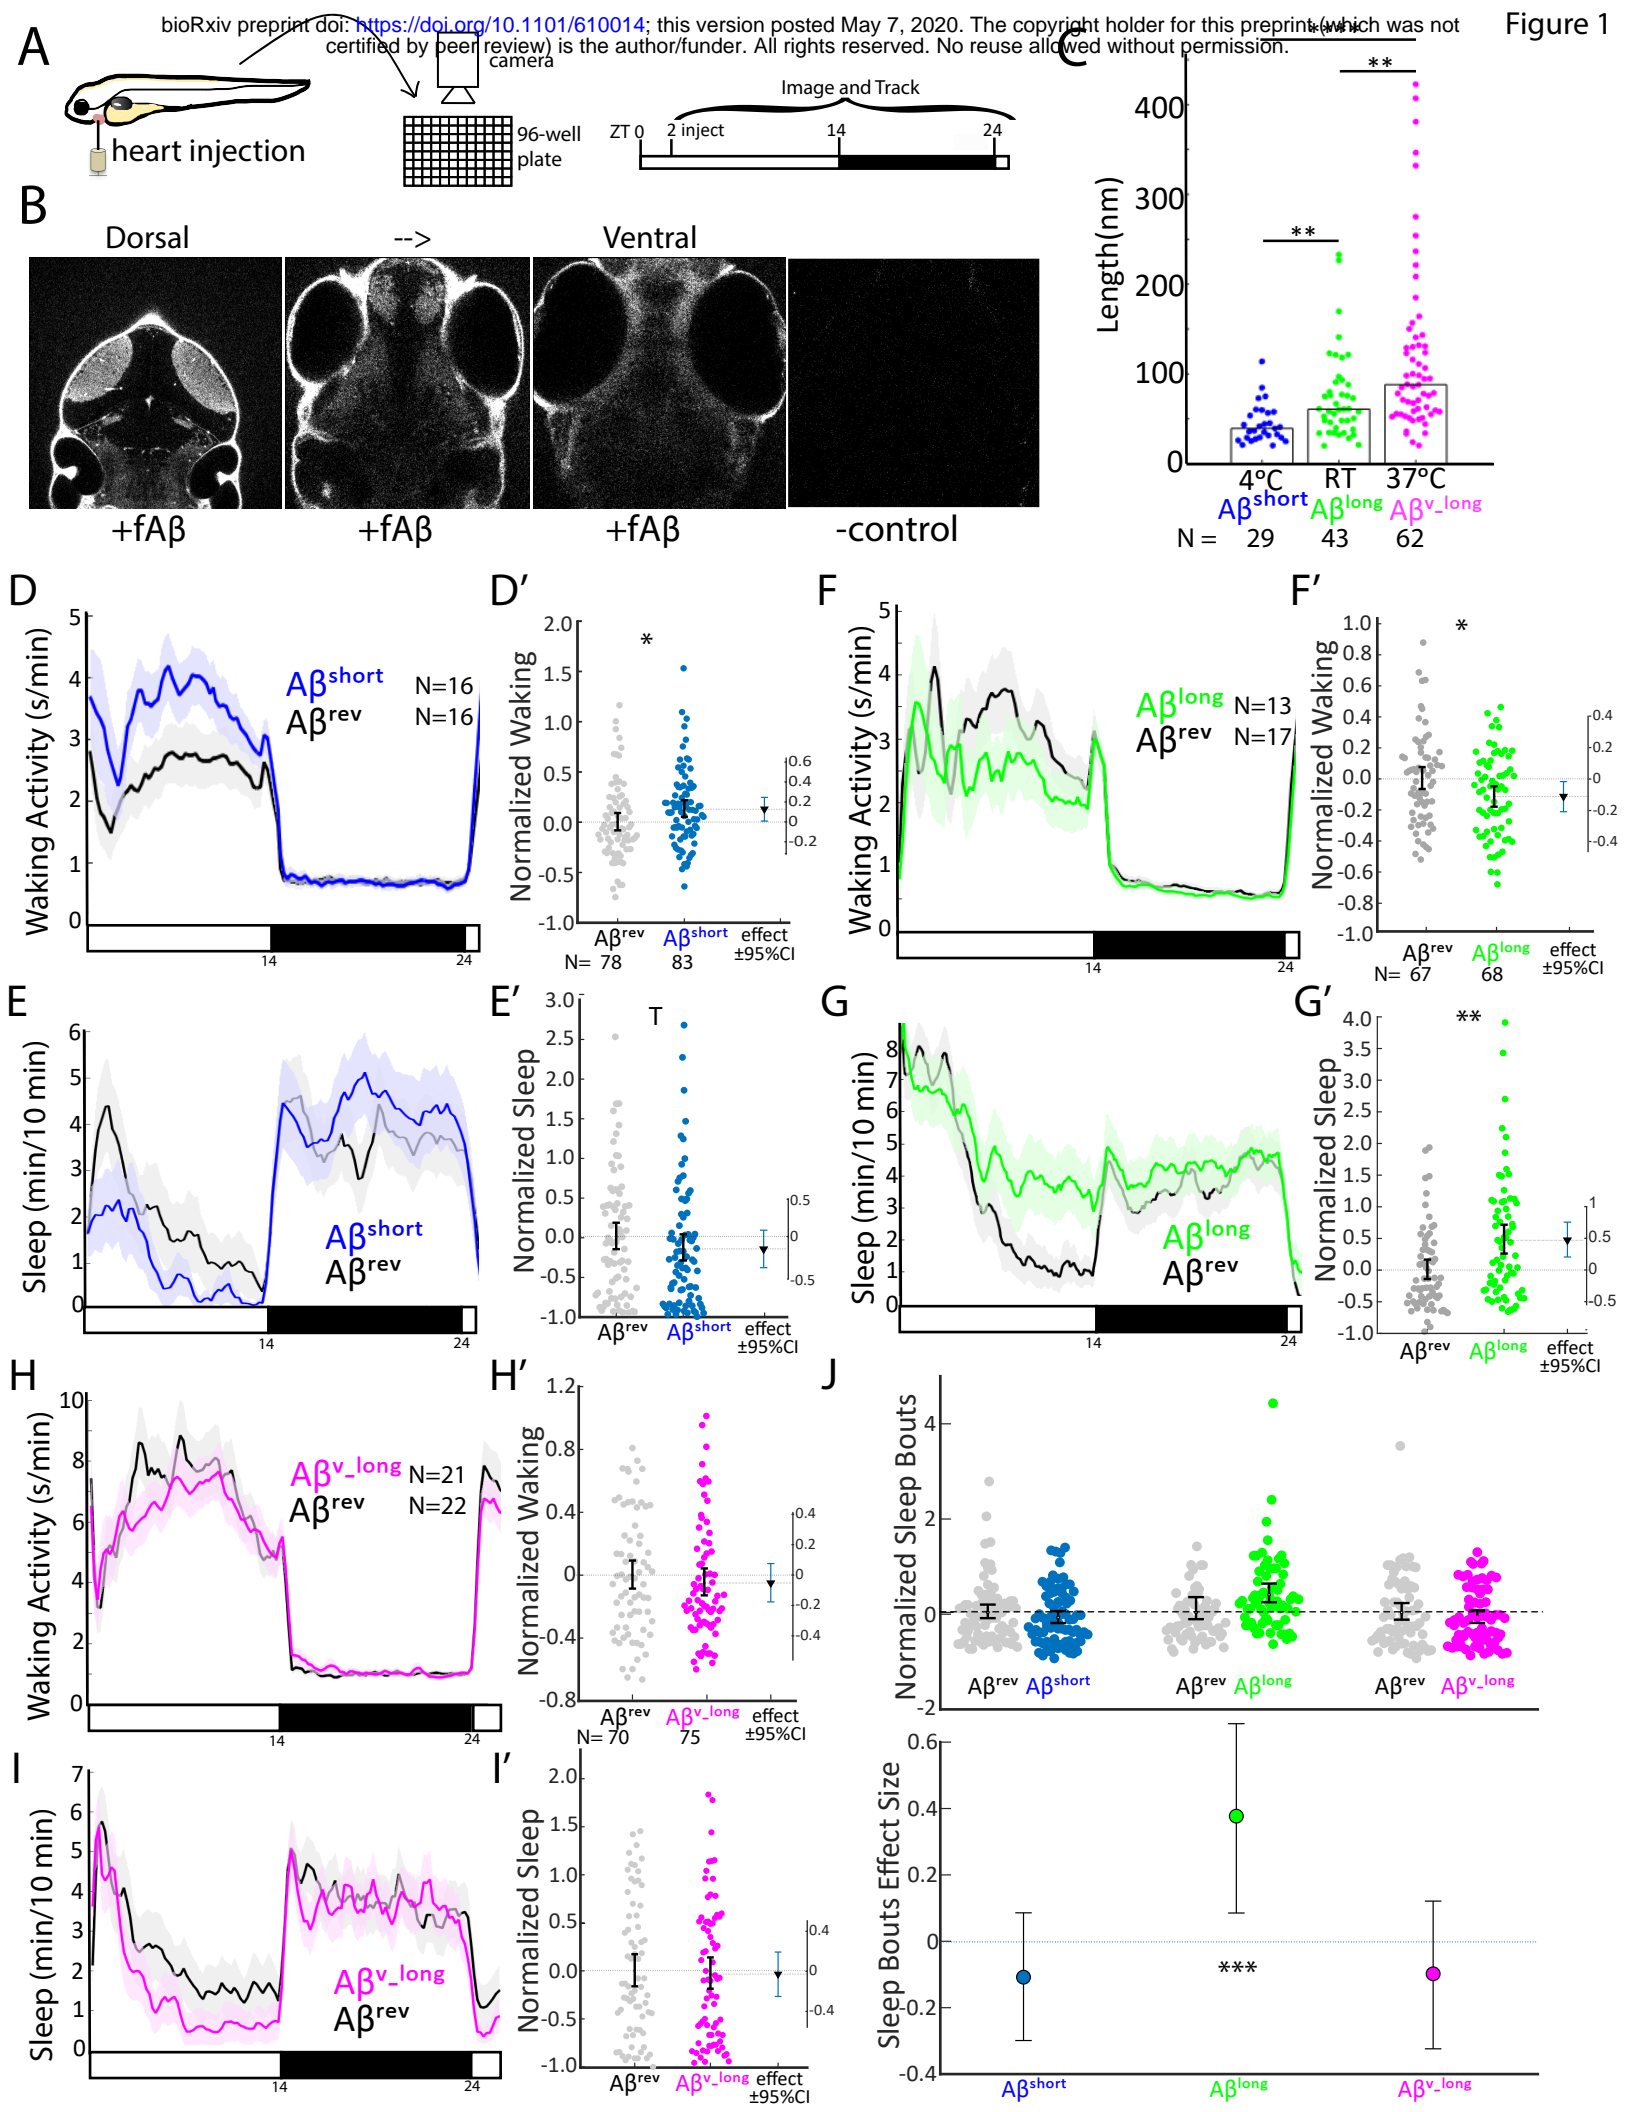

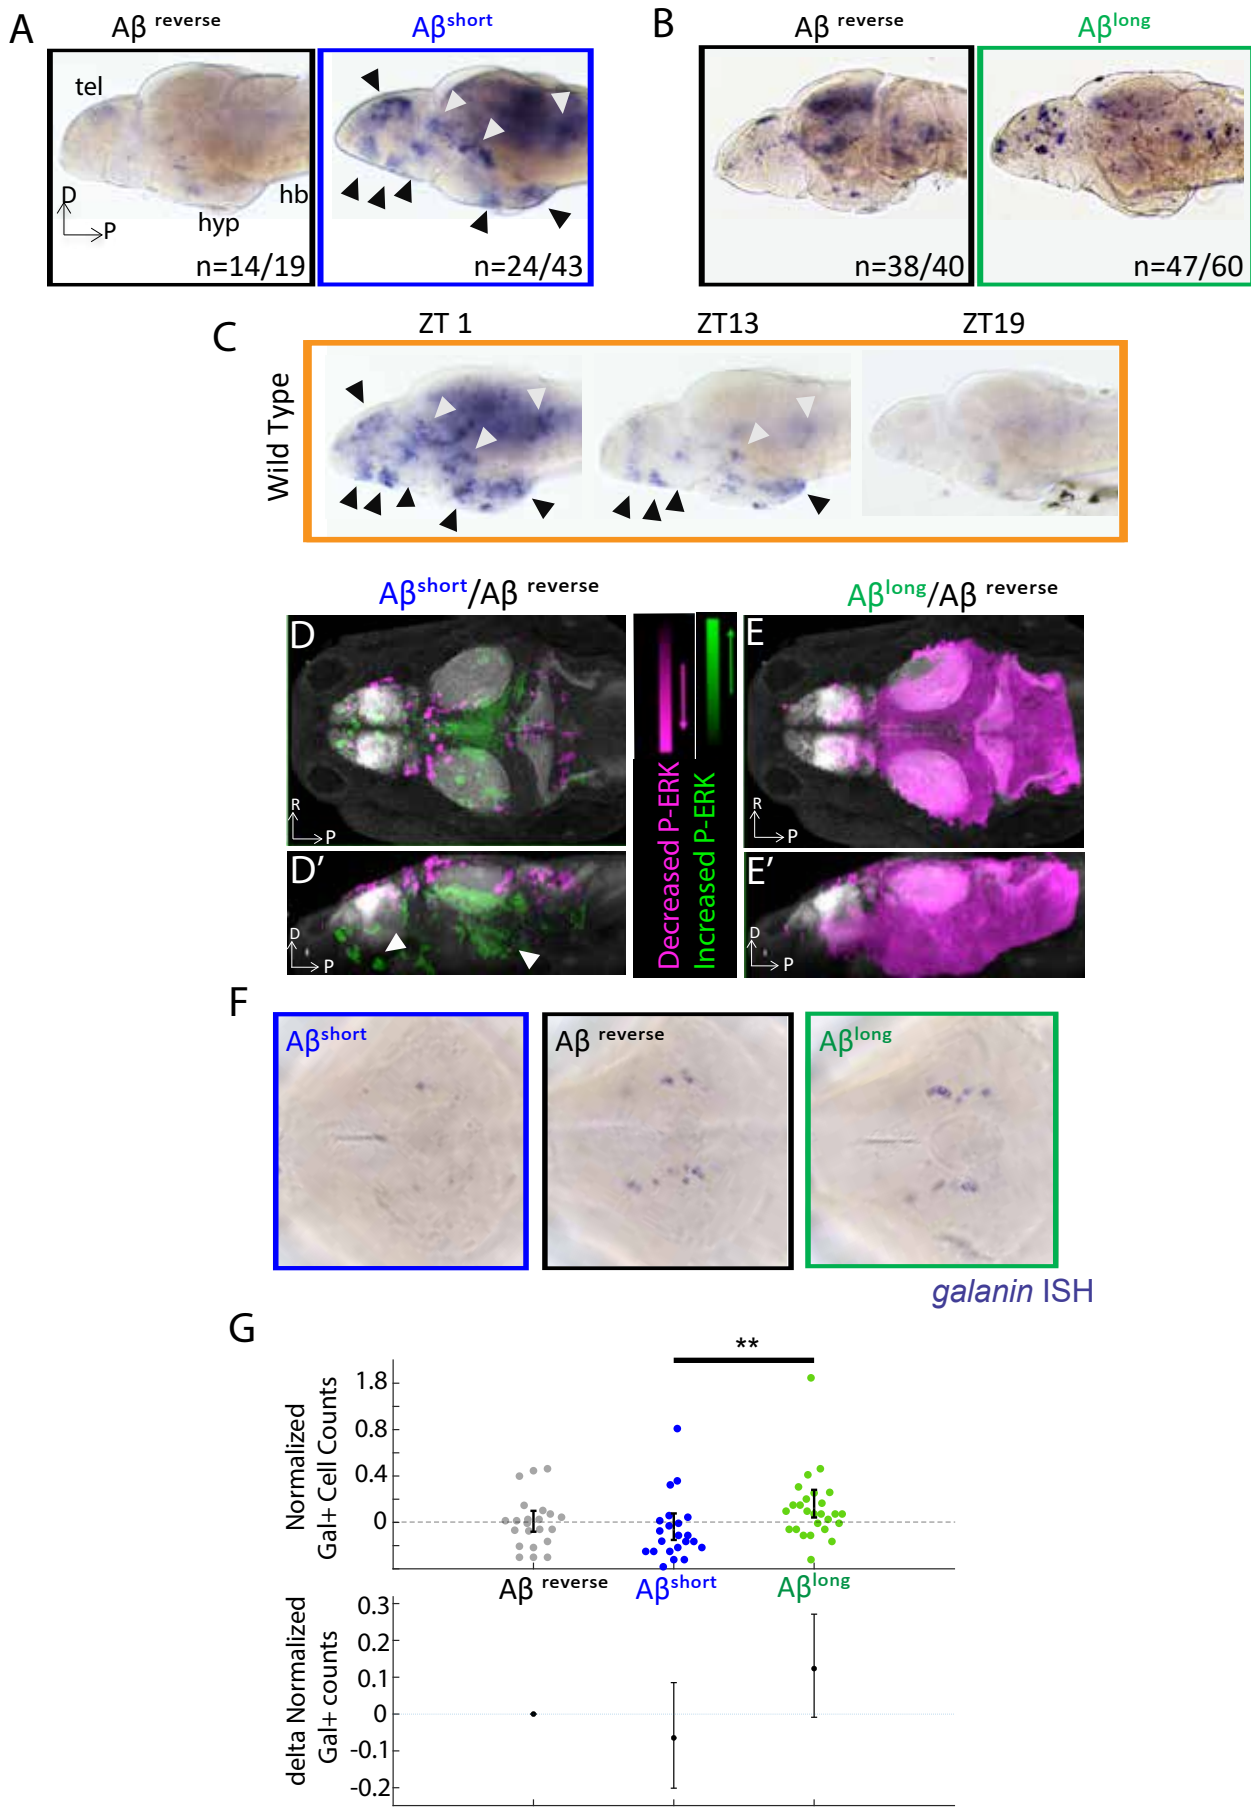

Figure 2

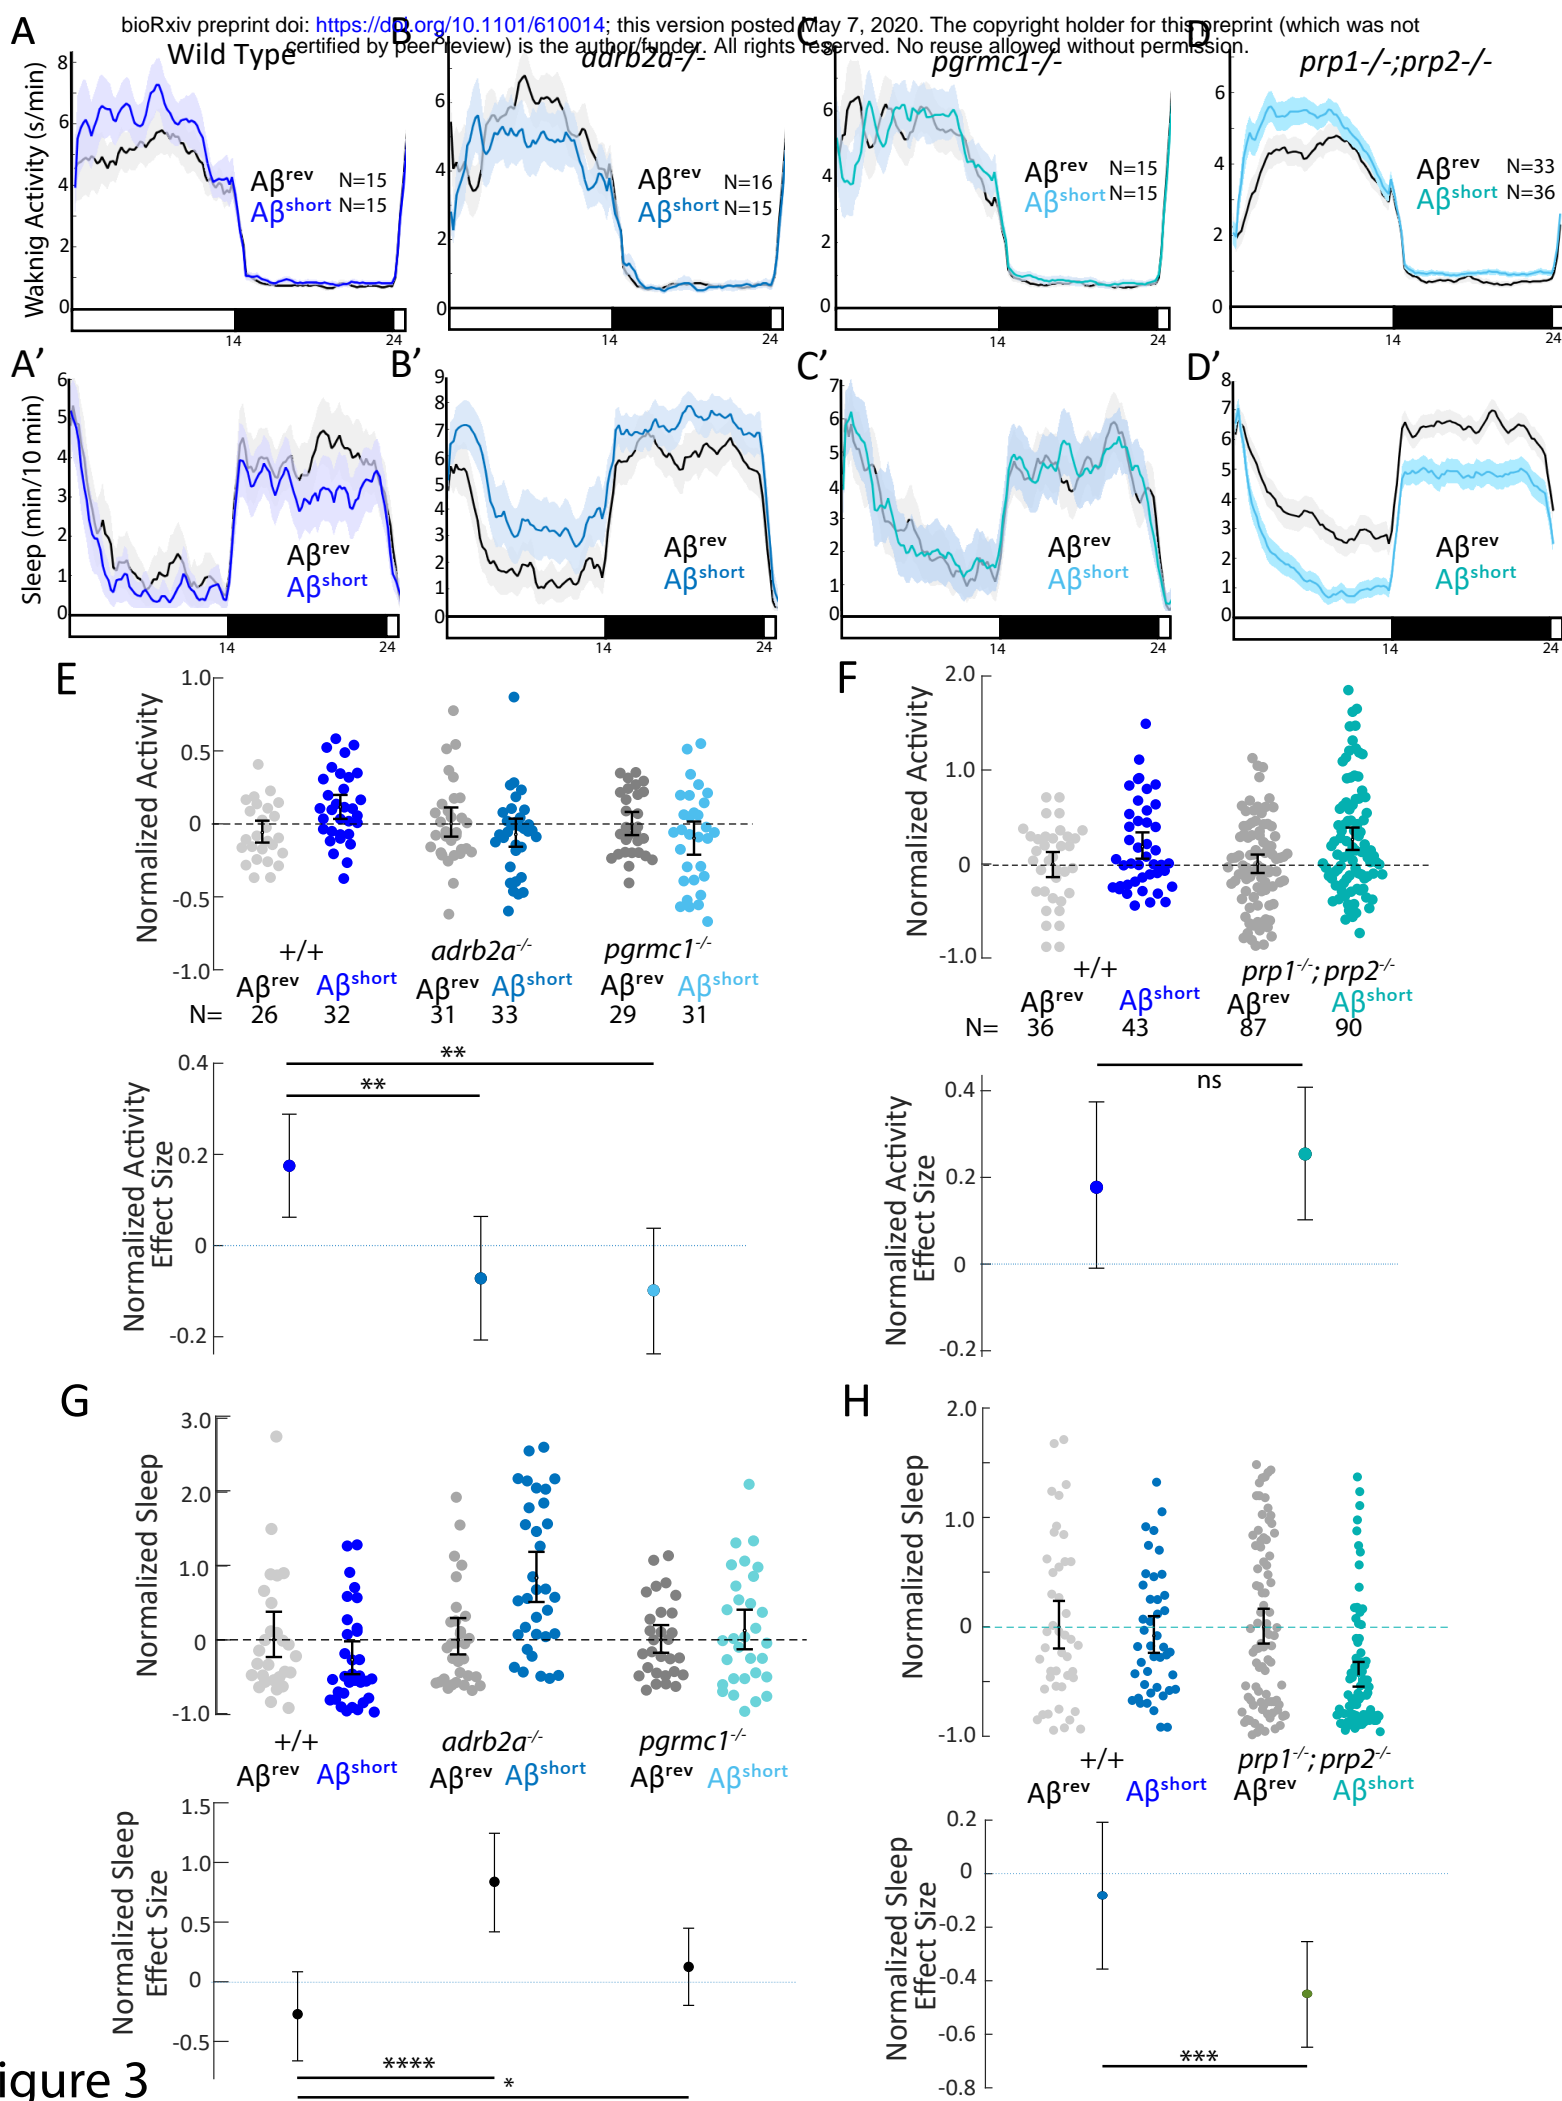

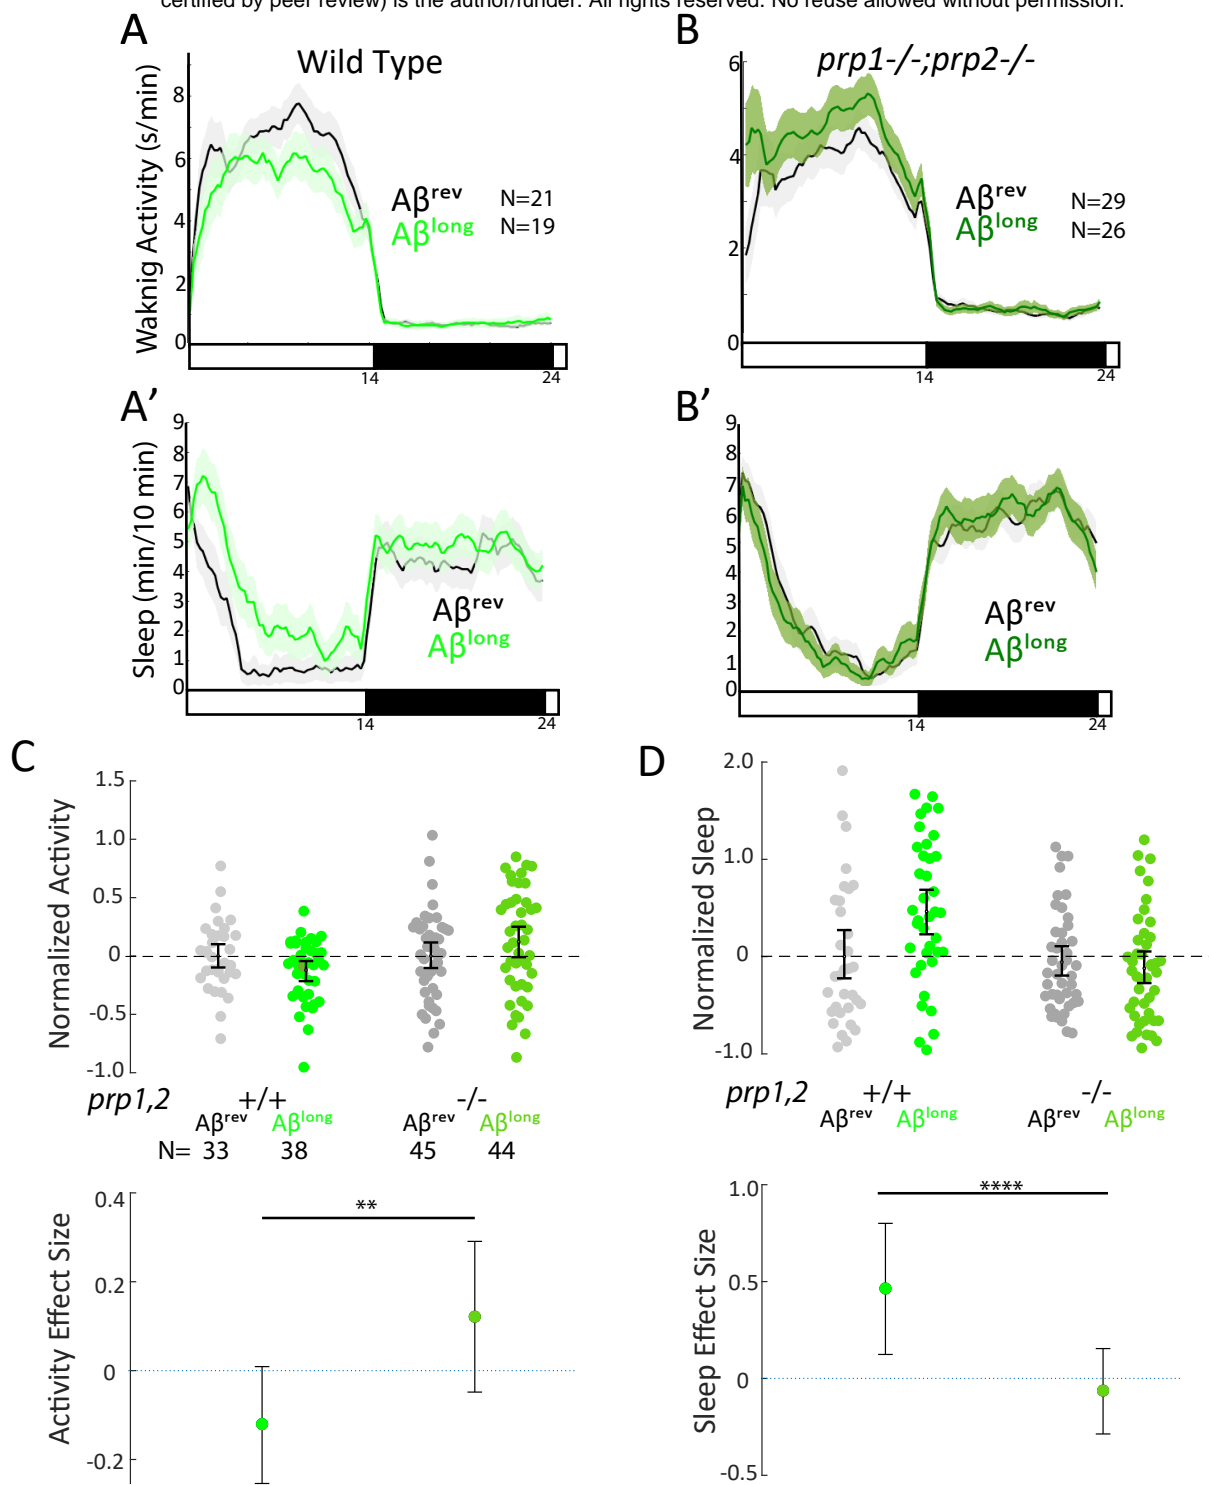

Figure 4

# Figure 5

A

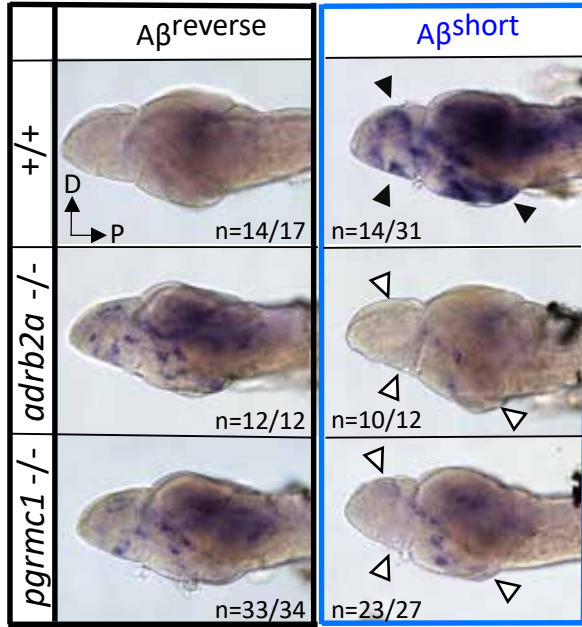

B

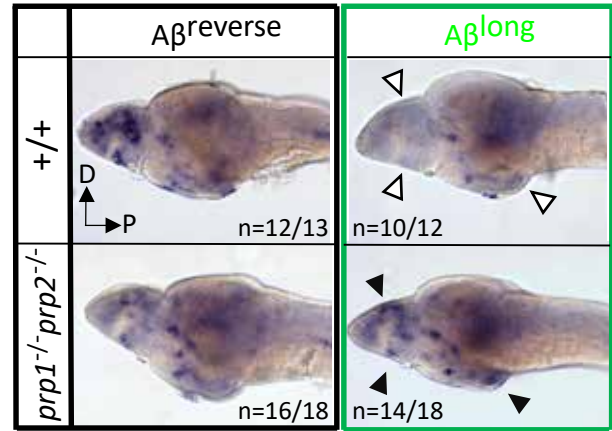



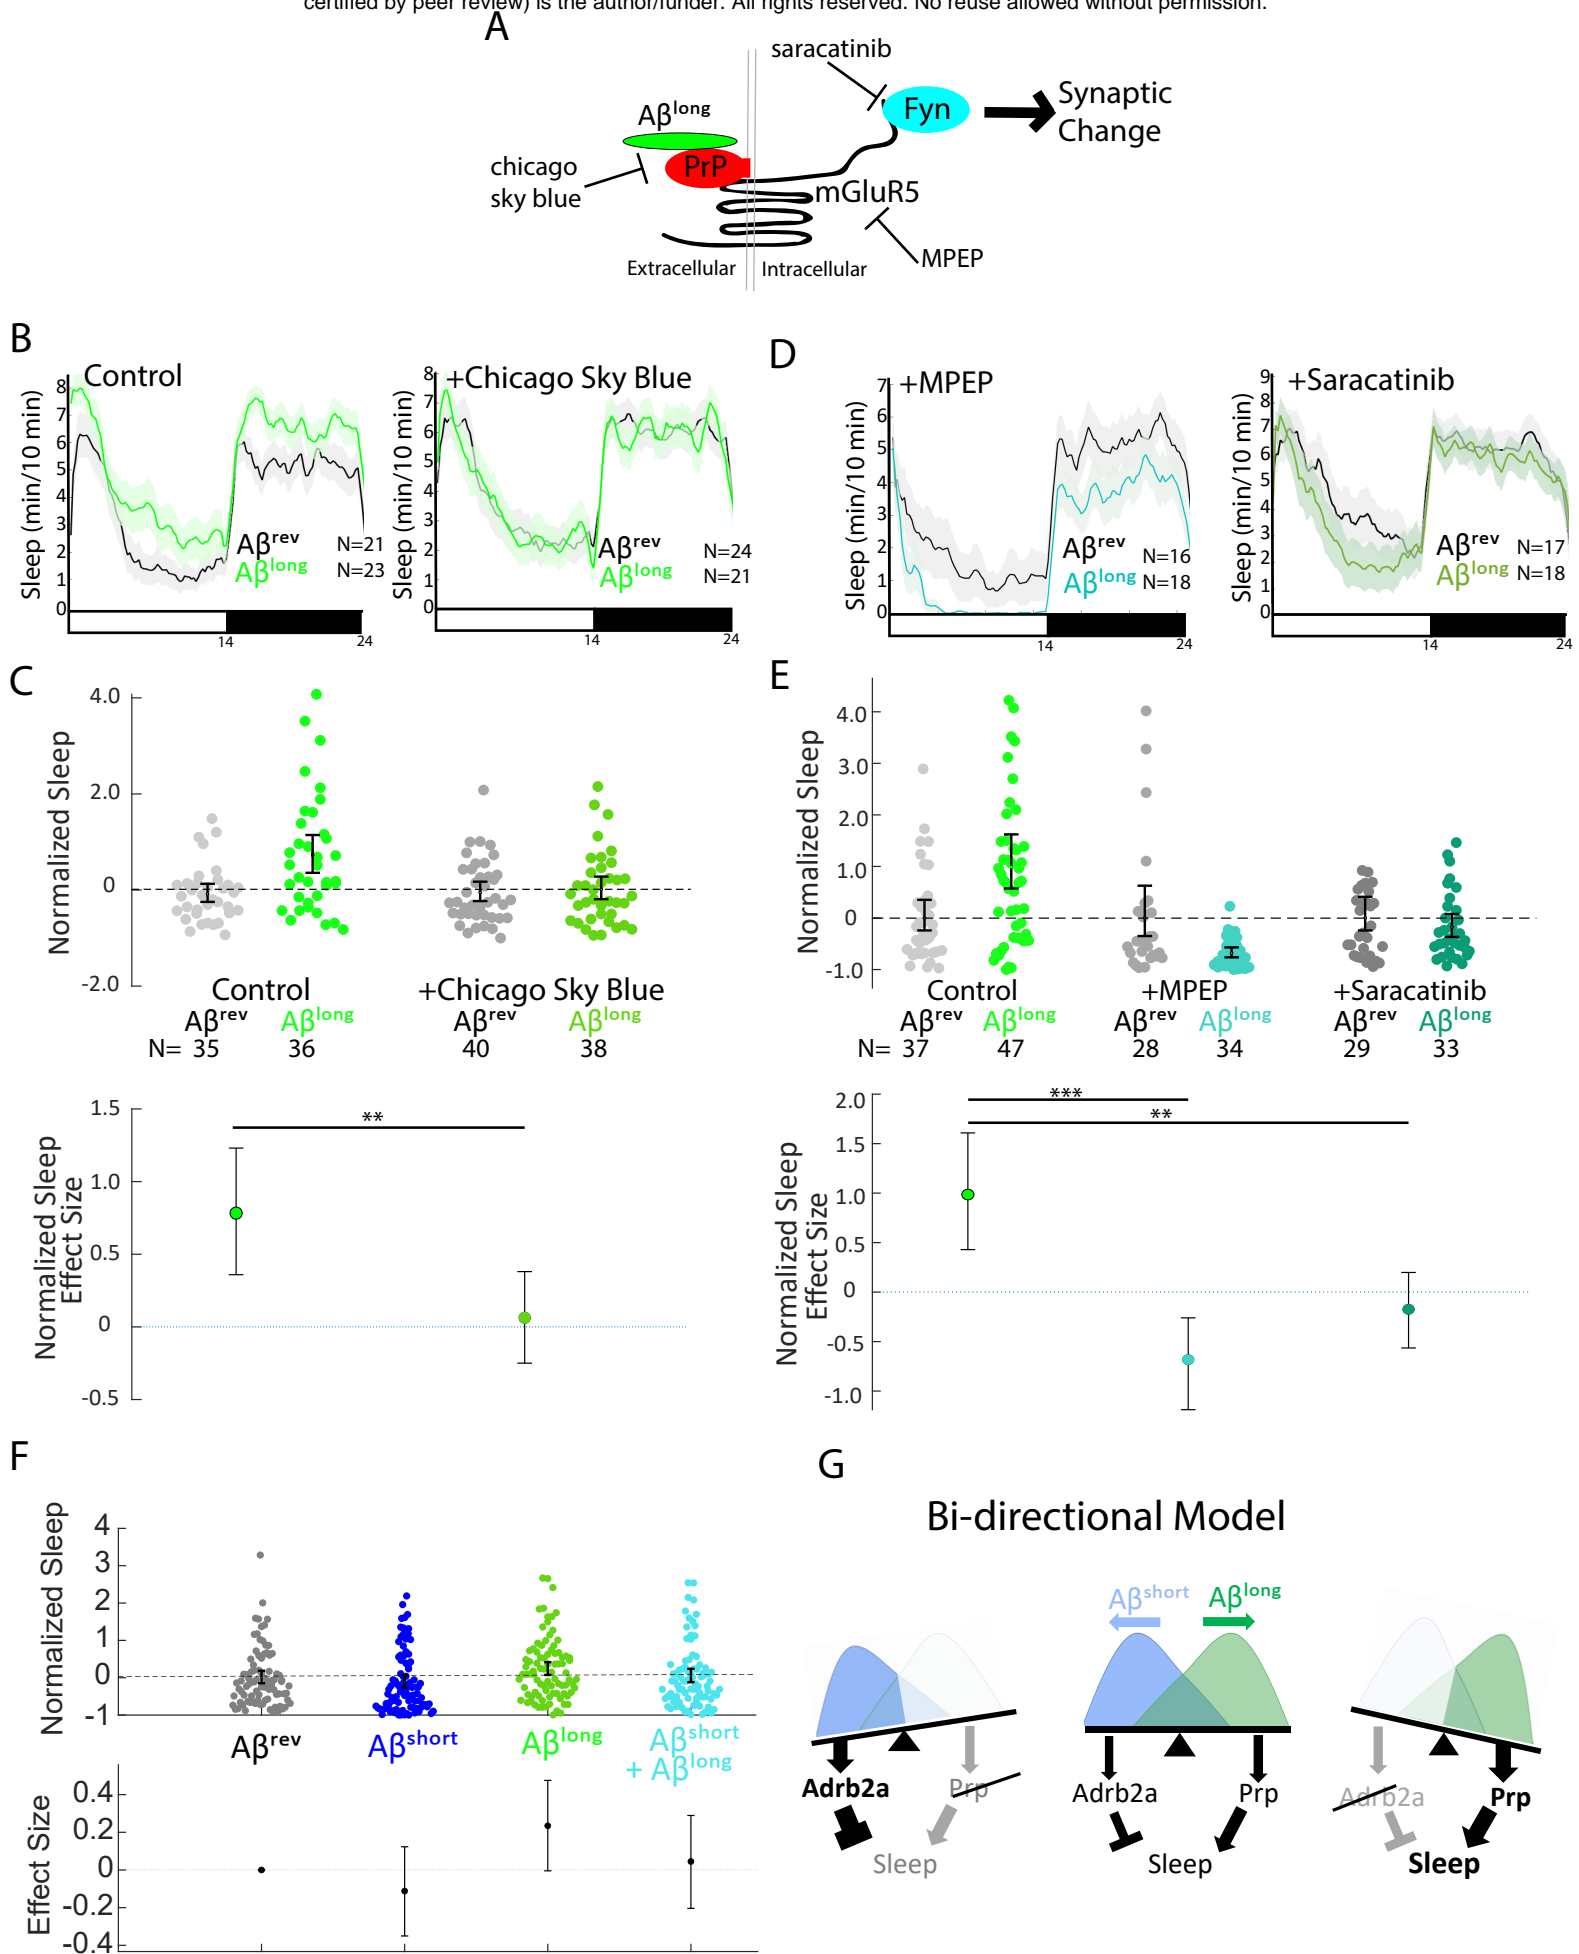

Figure 6

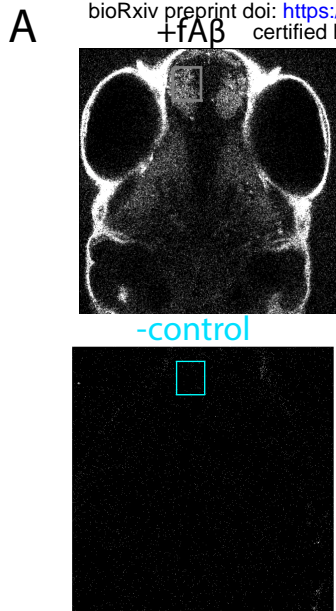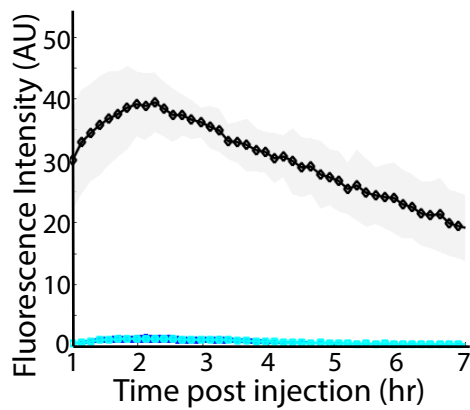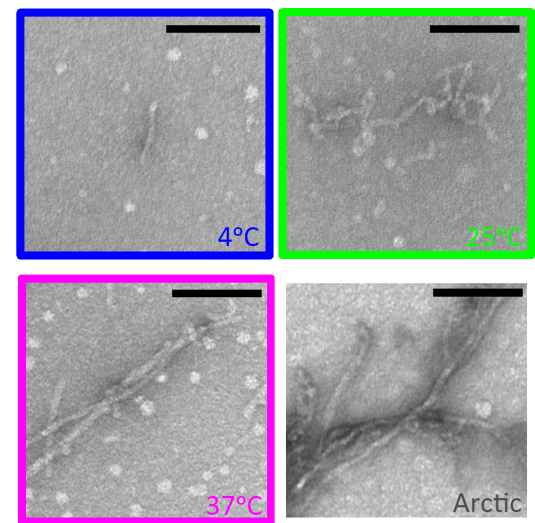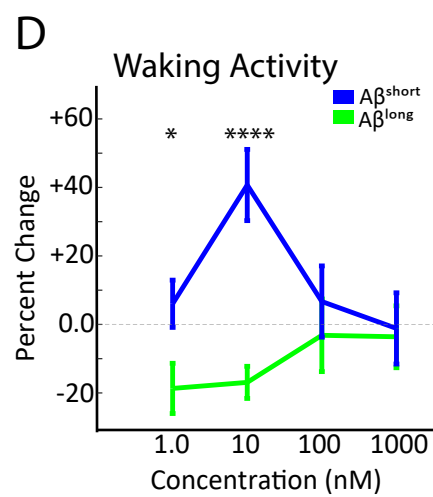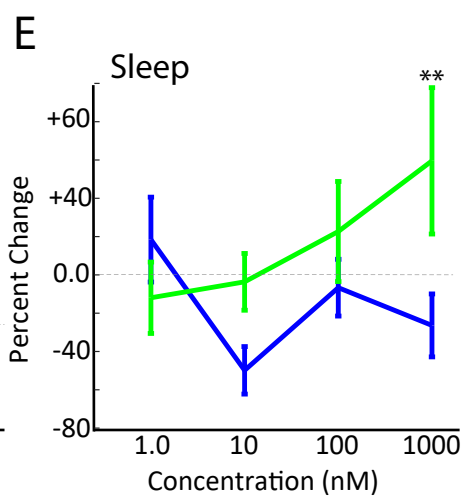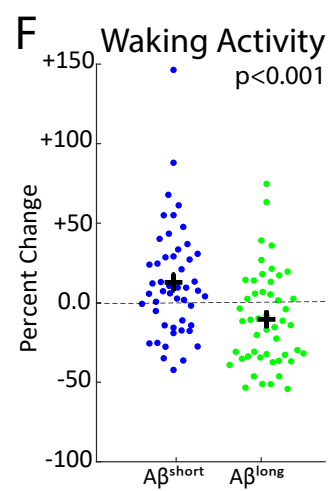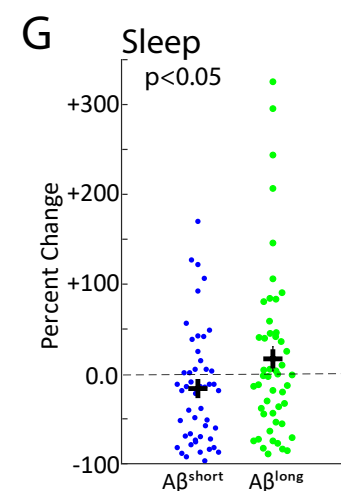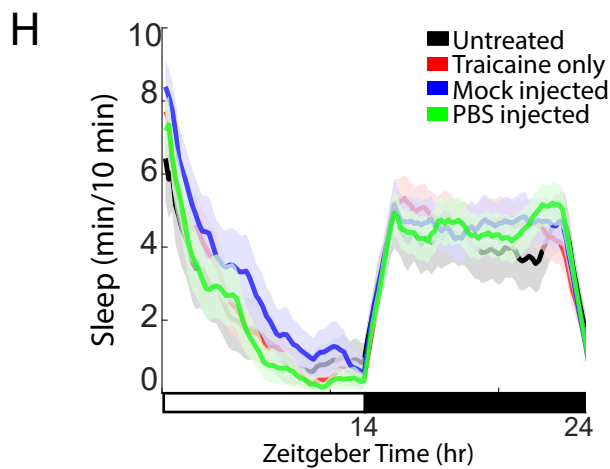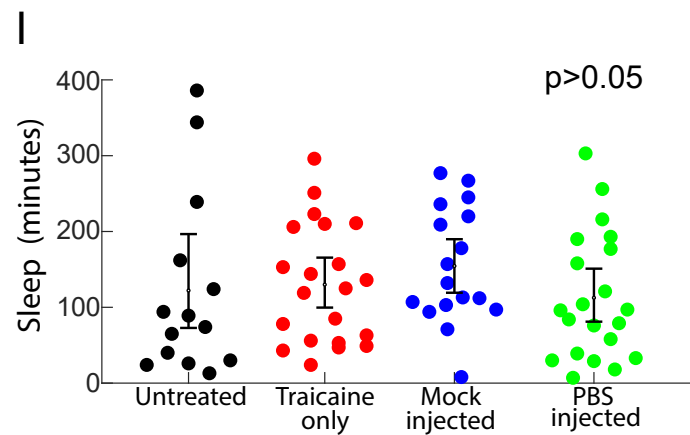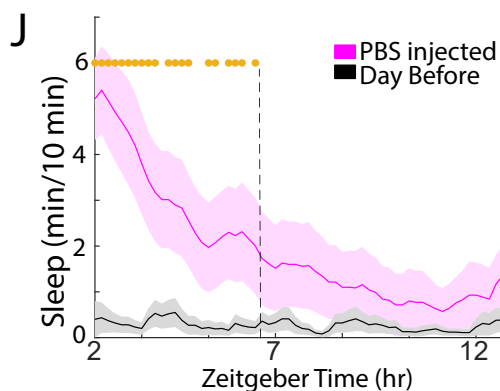

**K**

|       | Short    |          | Effect Size | Lower    | Upper    | p-value  |
|-------|----------|----------|-------------|----------|----------|----------|
| Wake  | full day |          | 0.1279      | 0.0086   | 0.2446   | 0.037    |
|       | evening  |          | 0.1132      | 0.02102  | 0.20294  | 0.008    |
| Sleep | full day |          | -0.1549     | -0.3868  | 0.0813   | p > 0.05 |
|       | evening  |          | 0.047       | -0.1777  | 0.271    | p > 0.05 |
| Long  | Wake     | full day | -0.1126     | -0.21088 | -0.01689 | 0.025    |
|       | evening  |          | -0.1698     | -0.24438 | -0.09838 | 1.32E-05 |
| Sleep | full day |          | 0.4715      | 0.2053   | 0.7552   | 0.001    |
|       | evening  |          | 1.038       | 0.4592   | 1.6421   | 0.002    |

Figure 1- figure supplement 1



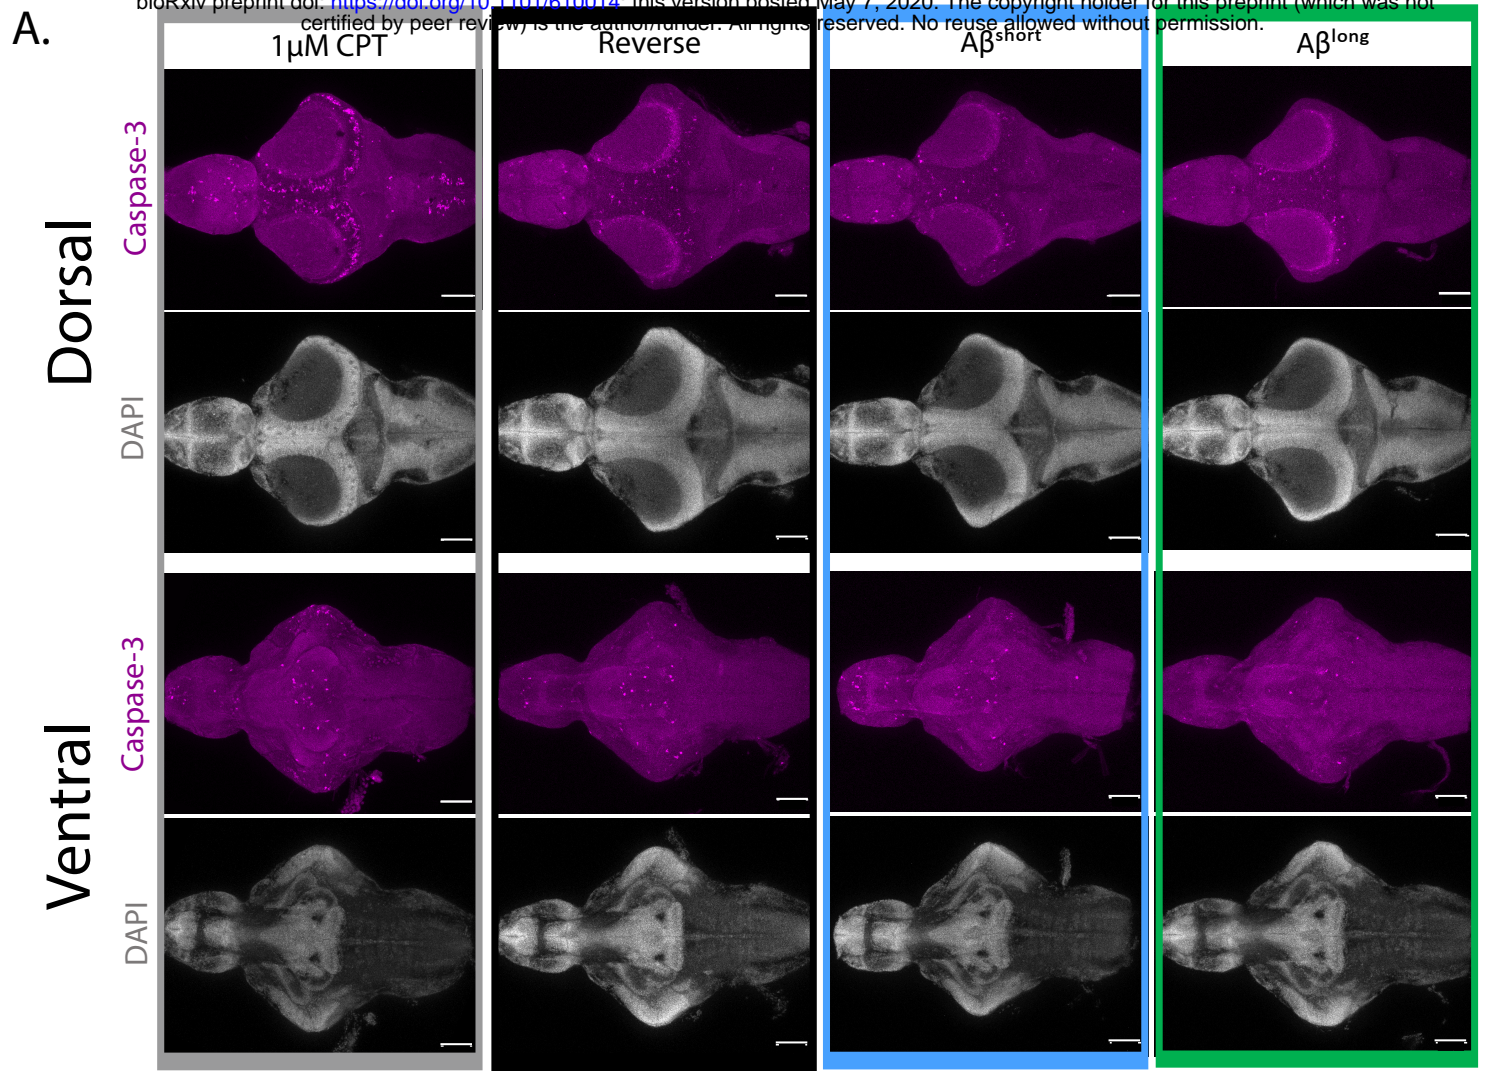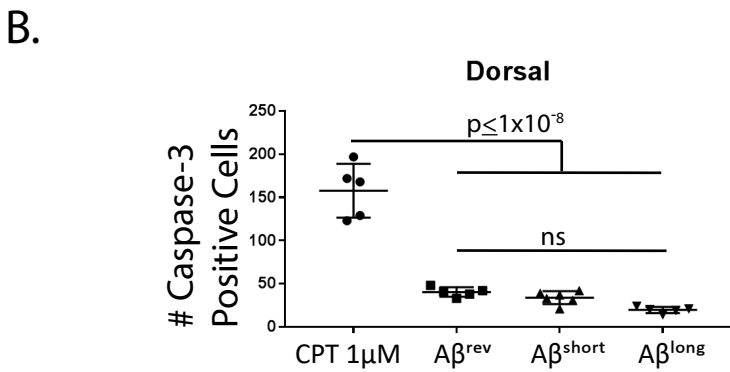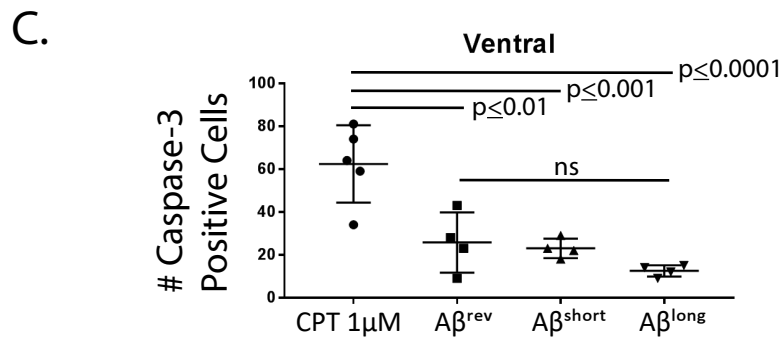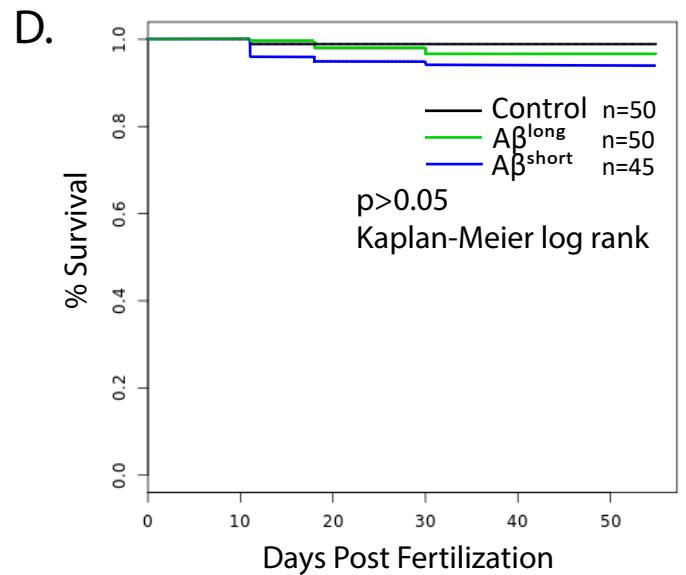

Figure 1- figure supplement 2

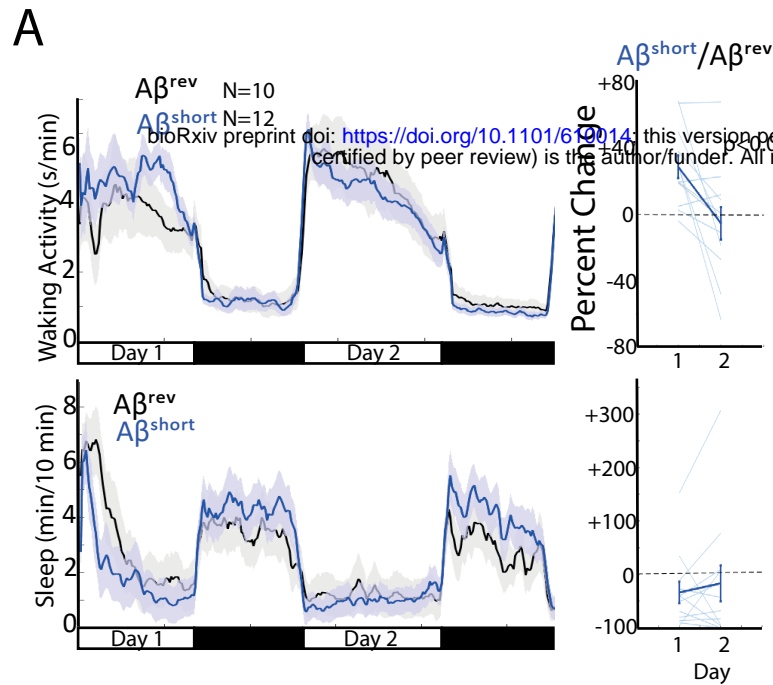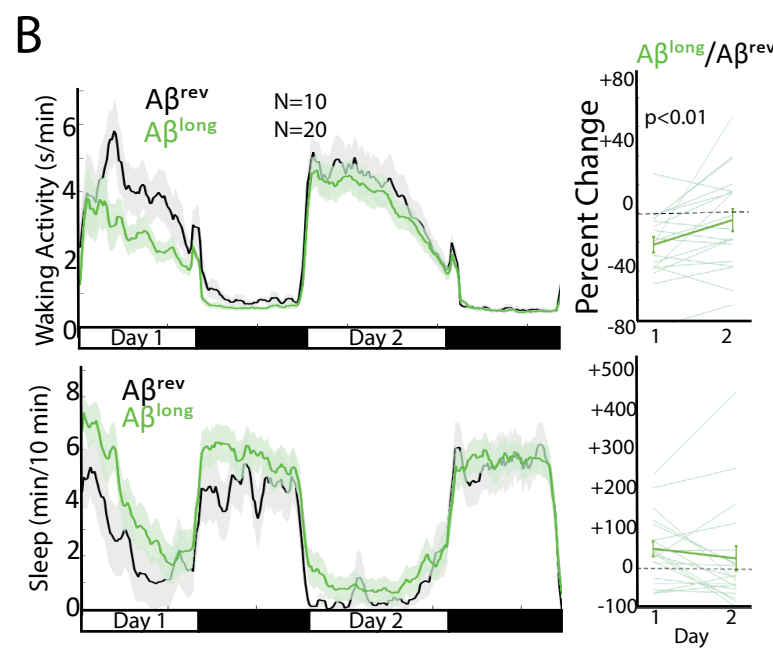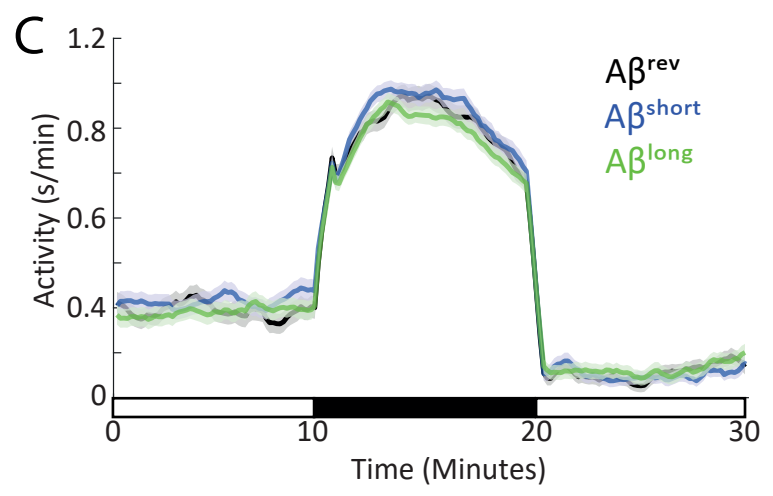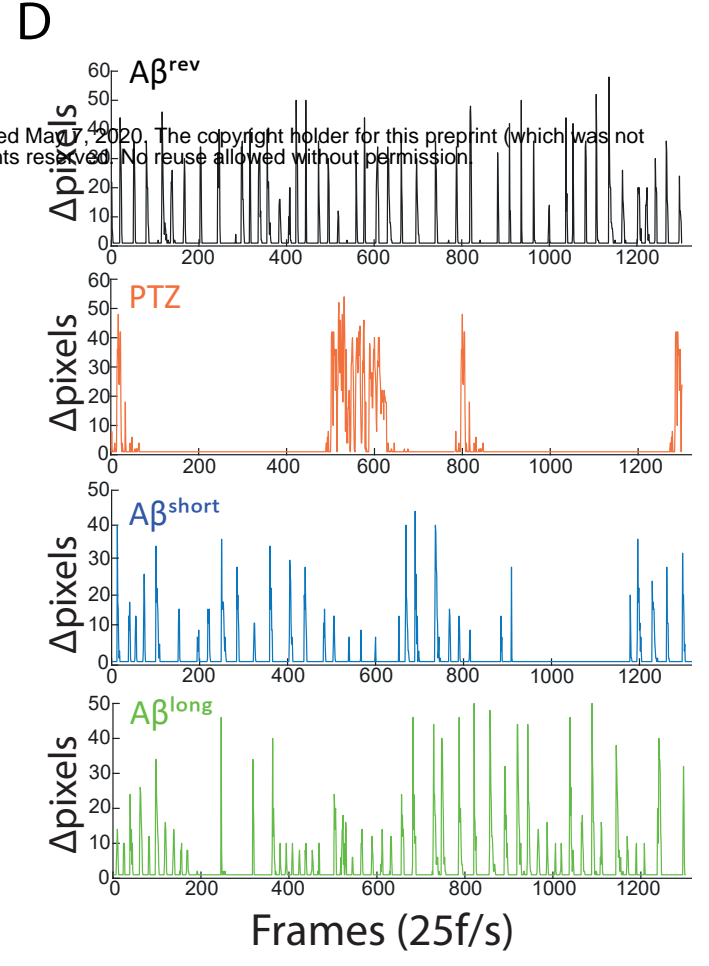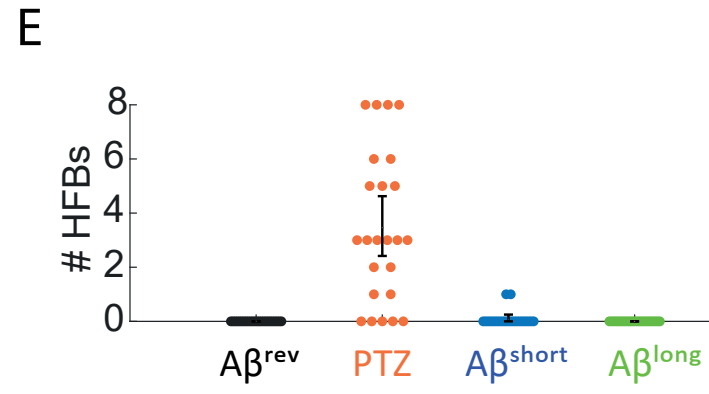

Figure S1-3

A

hPGRMC1

N-

TM

-C

Pgrmc1  $\Delta 16$ 

bioRxiv preprint doi: <https://doi.org/10.1101/610014>; this version posted May 7, 2020. The copyright holder for this preprint (which was not certified by peer review) is the author/funder. All rights reserved. No reuse allowed without permission.

B

|         |     |                                                                 |
|---------|-----|-----------------------------------------------------------------|
| zPgrmc1 | 1   | MAEEAVEQ-----SGILQEIFTSPLNISLLCLCLFLLYKIIRGDKPADYGPVE--         |
| hPGRMC1 | 1   | MAAEDVAVATGADPSDLESGLLHEIFTSPLNLLLLGLCLIFLLYKIVRGDQPAASGDSDDD   |
| zPgrmc1 | 50  | --EPLPKLKKRDFTLADLQEQYDGLKNPRILMAVNGKVFVDVTRGKKFYGPEGYPYGVFAGKD |
| hPGRMC1 | 61  | EPPPLPRLKRRDFTPAELRRFDGVDPRILMAINGKVFVDVTKGRKFFYGPEGYPYGVFAGRD  |
| zPgrmc1 | 108 | ASRGLATFCLKEKALKDTHDDLSDLNAMQOQESLSEWETQFTQKYDYIGKLLKPGEETPEY   |
| hPGRMC1 | 121 | ASRGLATFCLDKEALKDEYDDLSDLTAAQOQETLSDWESQFTFKYHHVVGKLLKEGEEPTVY  |
| zPgrmc1 | 168 | TDDEEVKDK---KKD                                                 |
| hPGRMC1 | 181 | SDEEVPKDESARKND                                                 |

C

|                           |                                                        |
|---------------------------|--------------------------------------------------------|
|                           | 121                                                    |
| <i>pgrmc1</i> WT          | 5'...CCGCGGAGACAAGCCTGCAGACTATGGCCCGGTTGAGGAGCCGCTGCCC |
| <i>pgrmc1</i> $\Delta 16$ | 5'...CCGCGGAGACAAGCC -GC-----TGAGGAGCCGCTGCCC          |

D

|                    |                 |                              |      |
|--------------------|-----------------|------------------------------|------|
|                    | 31              | 43                           | 179  |
| Pgrmc1 WT          | ...FLLYKIIRGDKP | ADYGPVEE PLPKLKKRDFTLAD..... | Stop |
| Pgrmc1 $\Delta 16$ | ...FLLYKIIRGDKP | LRSRCPNSRKEILL               | Stop |
|                    |                 | 43                           | 57   |

E

|         |     |                                                                |
|---------|-----|----------------------------------------------------------------|
|         |     | ADRB2a $\Delta 8$                                              |
| zAdrb2a | 1   | MGNIRSSIPEDL-----ICPNNTNASTSEQNTVLGLTMSILVLIIVFGNVM            |
| zAdrb2b | 1   | MEGENILITENTSLYMNISAGLNASSVSLSVSEYSAEVVLISILIGILVLVIVFGNAL     |
| hADRB2  | 1   | MGNPGNGS-AFLLAP-----NRSHAPDHDVTQQDEWVWGMGIVMSLIVLAIIVFGNVL     |
| zAdrb2a | 49  | VITAIISRFQRLQNVTNCFITSLACADLVMGLVVPFGALYIILNTWHFGHFLCDFWTATD   |
| zAdrb2b | 61  | VISAIIVRFQRLQVTNYFITSLLACADLVMGLVVPFGACYILLNTWHFGNFCEFWTATD    |
| hADRB2  | 54  | VITAIAKERLQVTNYFITSLLACADLVMGLAVVPFGAAHILMKMWTFGNFCEFWTSID     |
| zAdrb2a | 109 | VLCVTASIETLCVIAVDRYIAITSPFRYQSLLTKNRARFIVLMVWVIAGLVSYLPIHMEW   |
| zAdrb2b | 121 | VLCVTASIETLCVIAVDRYIAITMPLRYQSMLTRKACGMVIGVWAVAALISFLPIHMEW    |
| hADRB2  | 114 | VLCVTASIETLCVIAVDRYFAITSPFRYQSLLTKNKARVITILMVWIVSGLTSFLPIQMHW  |
| zAdrb2a | 169 | WISTDNETLCCYNNTYCCEFDITYSYATVSSIIISFYIPLVIMVFVYSRVFQEARQQLKKI  |
| zAdrb2b | 181 | WVSDPEALSCLEEPTCCDENNAAYAVTSSIIISFYIPLVIMAFVYSRVFQEARQQLQKI    |
| hADRB2  | 174 | YRATHQEAINCYANETCCDEFNQAYAIASSIISFYIPLVIMVFVYSRVFQEARQQLQKI    |
| zAdrb2a | 229 | NKTEGRFHAKSNSRNQDVANNISEMRSTKKAIFYLKEHKALKTLGIIMGVFTLCWLPFF    |
| zAdrb2b | 241 | DRTEGRIRTSLSLQEGNE---IKN---RRTKFCMKDHKALKTLGIIMGVFTLCWLPFF     |
| hADRB2  | 234 | DKSEGRFHVQNLQVEQDGRTHGLR---RSKFKLKEHKALKTLGIIMGVFTLCWLPFF      |
| zAdrb2a | 289 | VLNVIP---KGSVDIWFTRILNWIGYANSANPLIYCRS PDFRYAFKEILCLNRSRYPNV   |
| zAdrb2b | 294 | VLNVVAAITWKMDNIMLPERILNWIGYANSANPLIYCRS PEFRCAFQEIICWRPSLPLST  |
| hADRB2  | 291 | IVNIVHVIQDNLIRKEVYIILLNWIGYVNSGFNPLIYCRS PDFRIAFQEIICLRRSSLKAY |
| zAdrb2a | 346 | FPNGYIYNH-----SWQSENEEQSKGSSGDSDHAEGNLAECECLADKTDSNGNCSKA      |
| zAdrb2b | 354 | RSKKGYSYSGH-----SWIVHTTTR--PREPSPMCETEG-AECLAGTKNKNGNYNKT      |
| hADRB2  | 351 | --GNGYSSNGNTGEQSGYVEEKENKLLCELLPTEDFVGHQGTGPSDNIDSGRNCST       |
| zAdrb2a | 401 | MRVL                                                           |
| zAdrb2b | 406 | VTS-                                                           |
| hADRB2  | 409 | NSLL                                                           |

F

|                          |                                                            |
|--------------------------|------------------------------------------------------------|
|                          | 1                                                          |
| <i>adrb2a</i> WT         | ATGGGAAACATAAGGTCCTCAATACCCGAAGATCTTATCTGTCCAAACAATACTAATG |
| <i>adrb2a</i> $\Delta 8$ | ATGGGAAACATAAGGTCCTCAATACC-----TTATCTGTCCAAACAATACTAATG    |

G

|                   |                             |      |
|-------------------|-----------------------------|------|
|                   | 1                           | 405  |
| Adrb2a WT         | MGNIRSSIP EDLCPNNTNAST..... | Stop |
| Adrb2a $\Delta 8$ | MGNIRSSIP YLSKQY            | Stop |
|                   | 1                           | 16   |

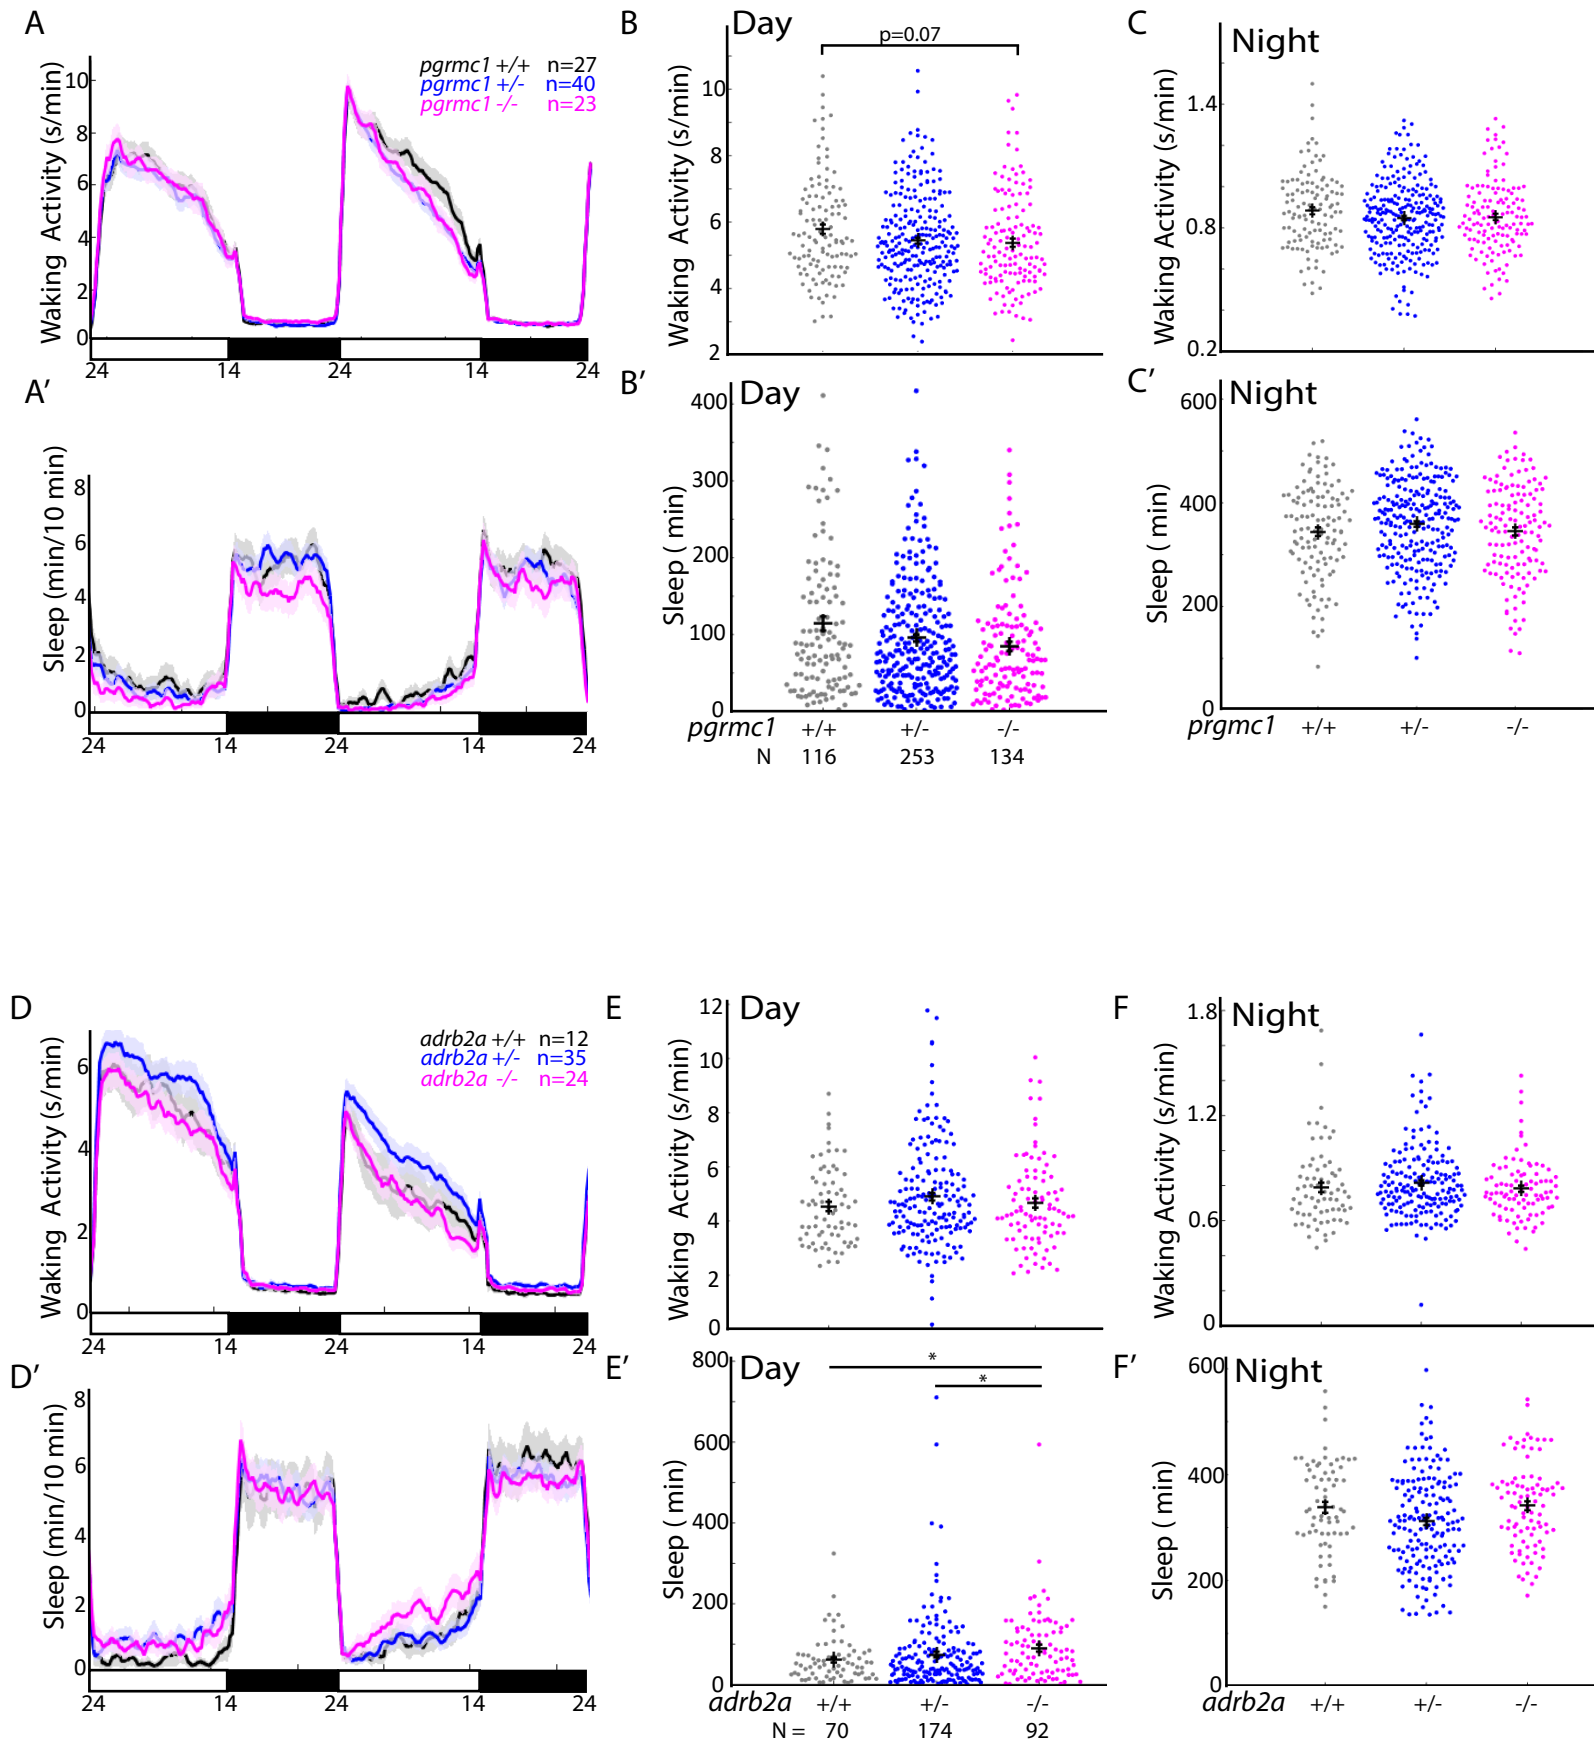

Figure 3- figure supplement 2



**A**

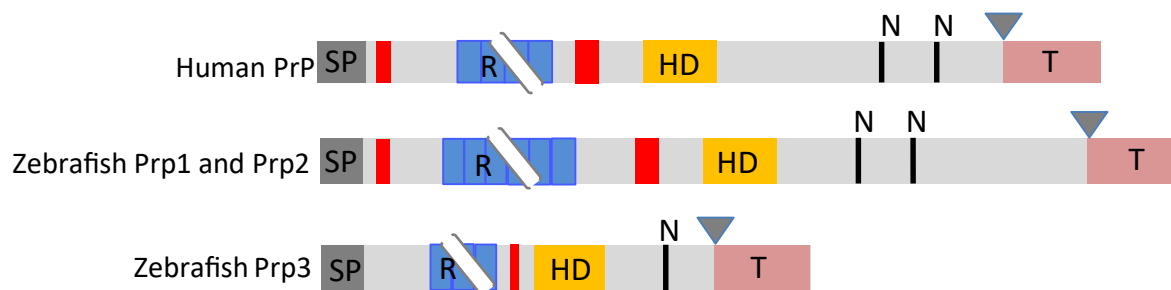

**B**

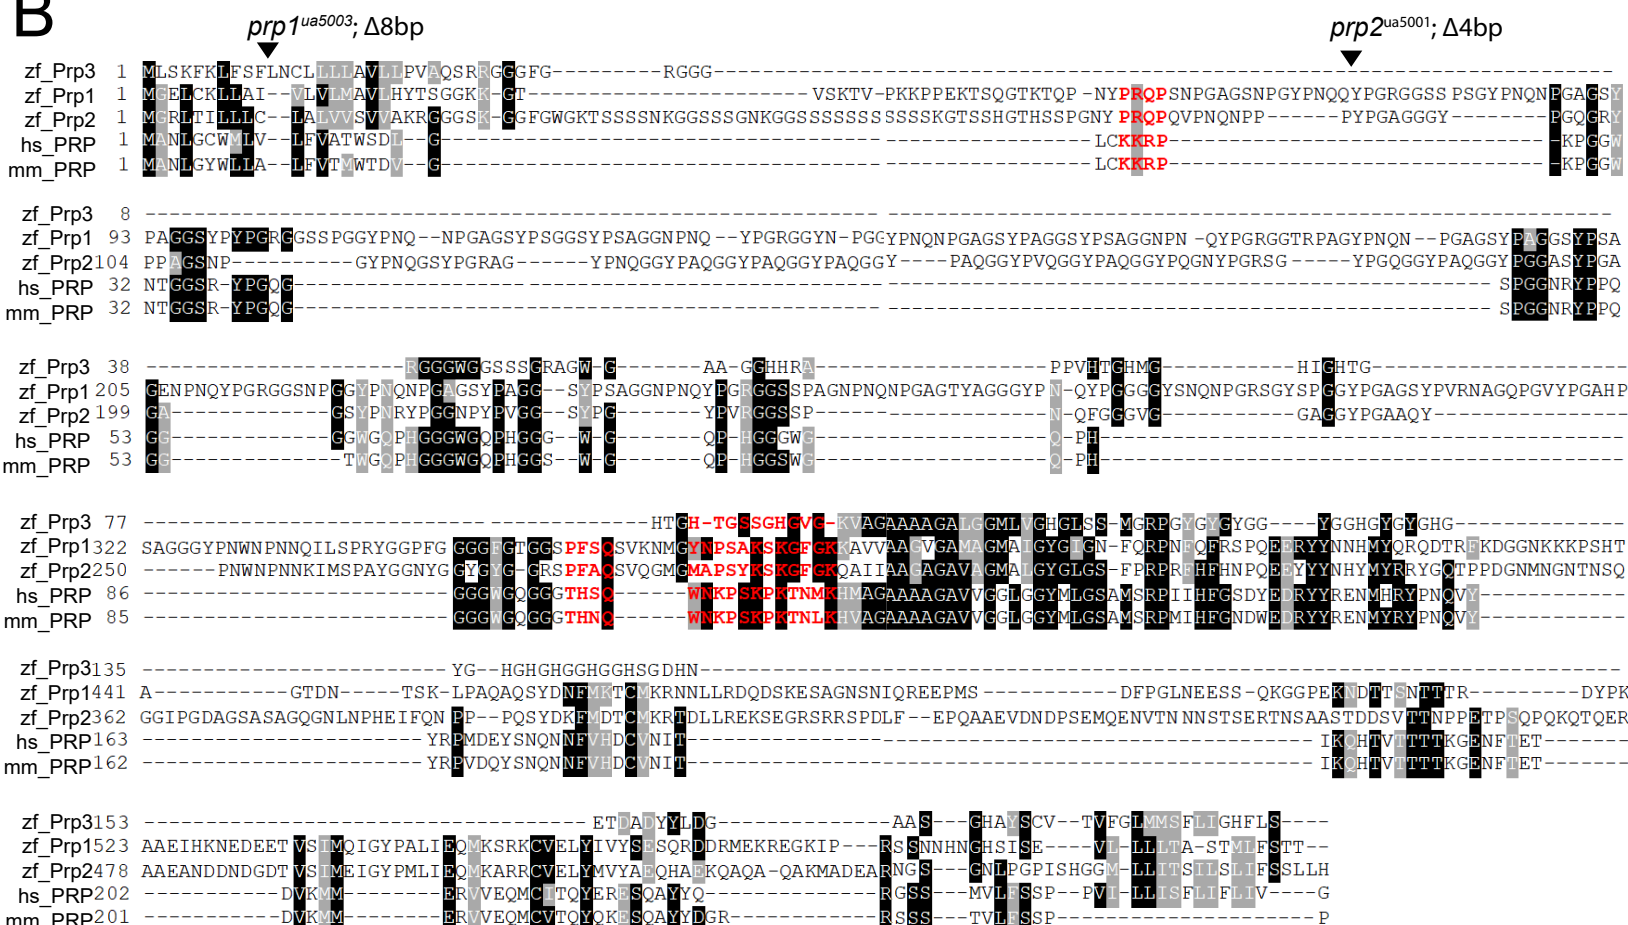

Figure 4- figure supplement 1

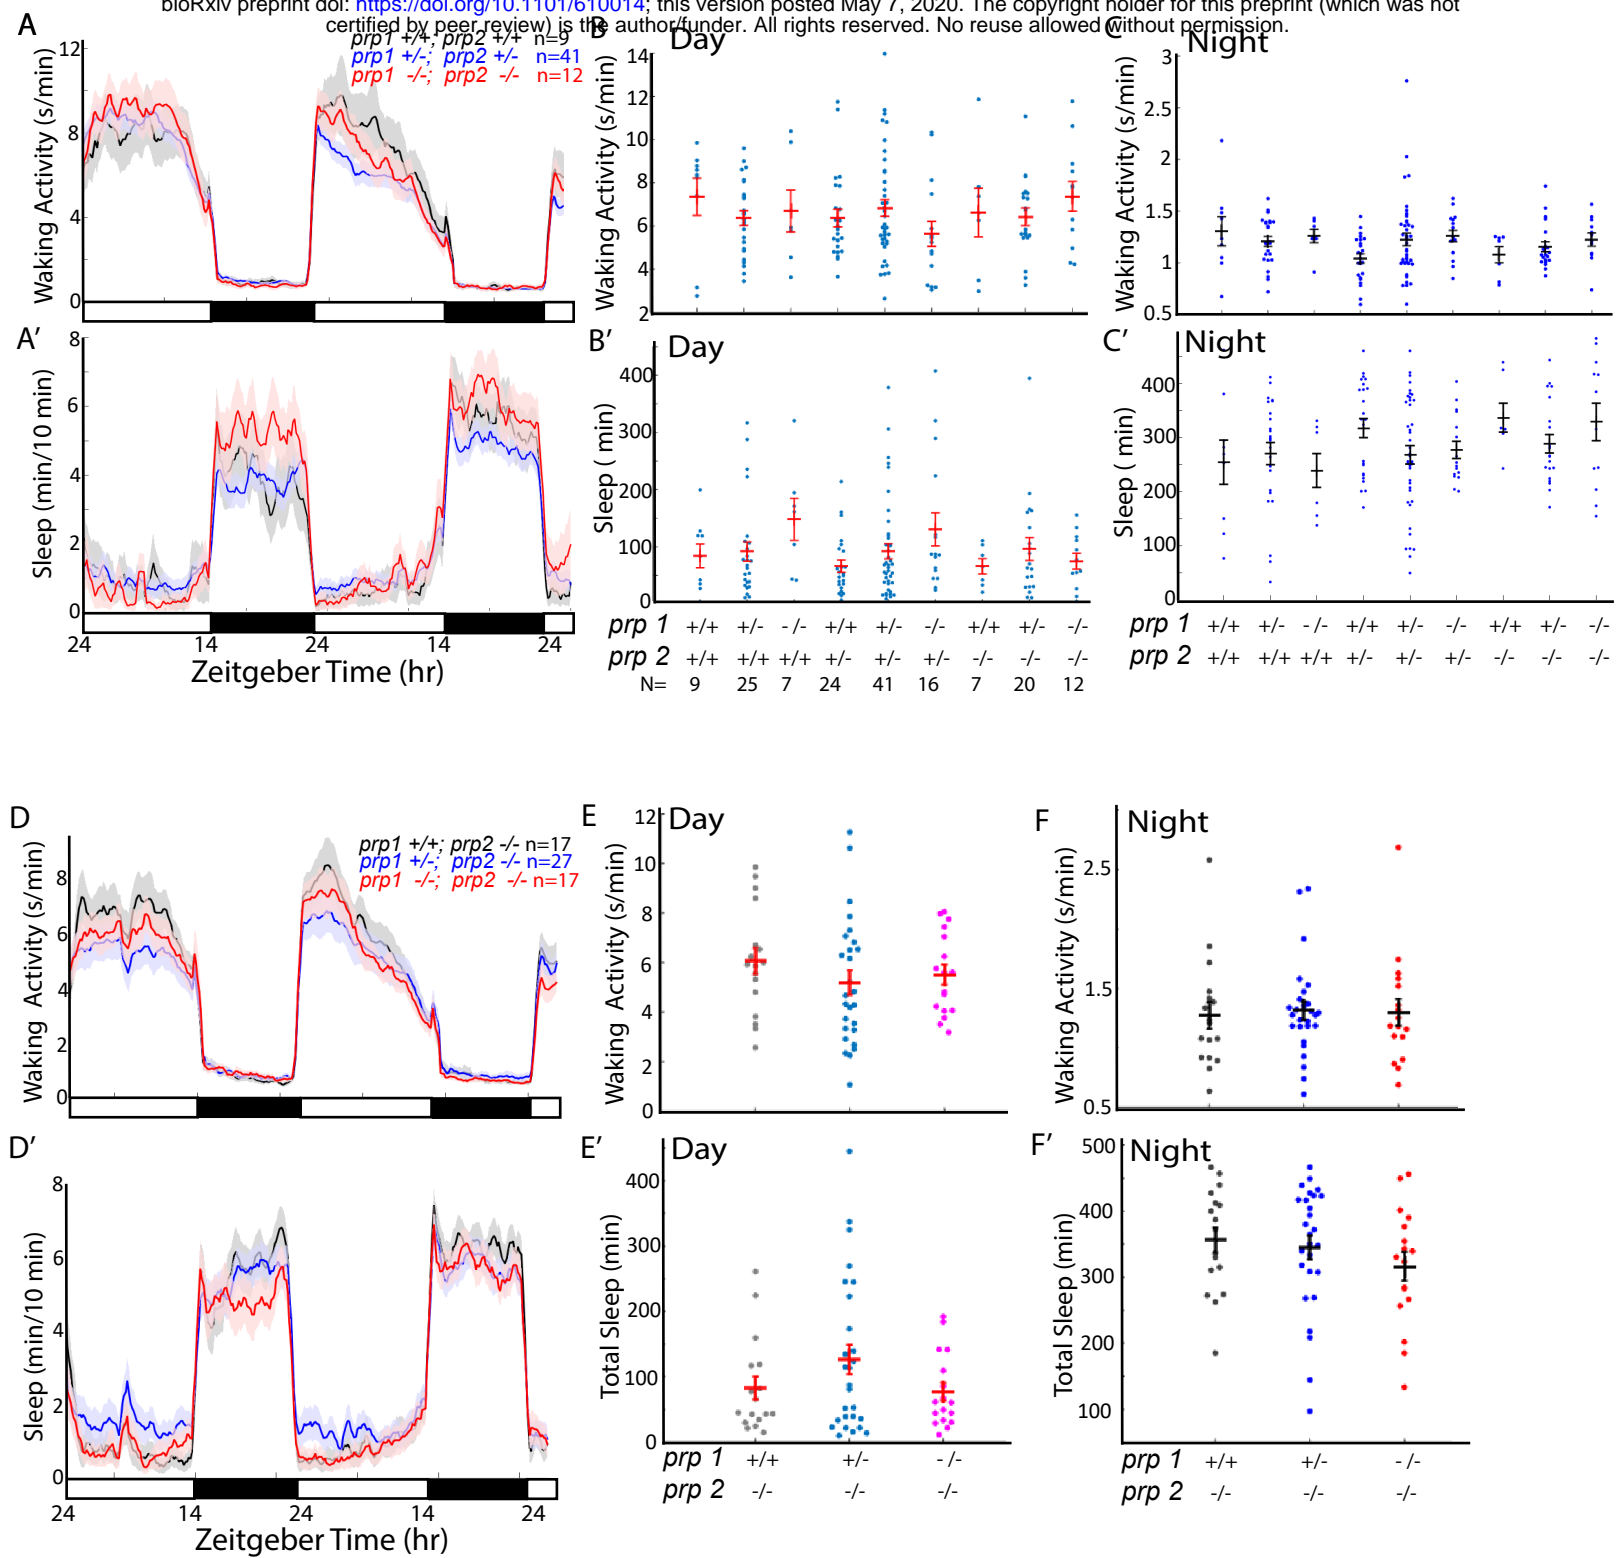

Figure 4- figure supplement 2

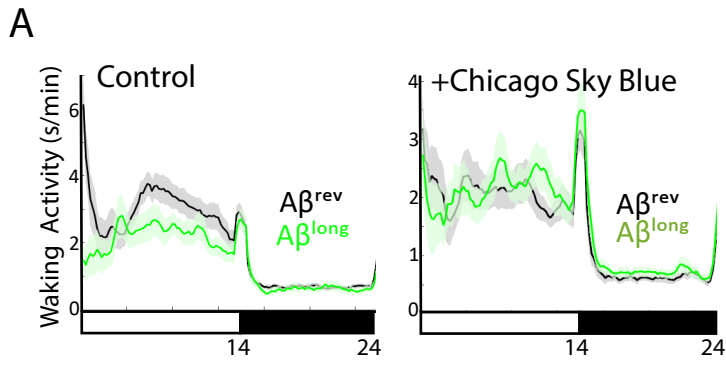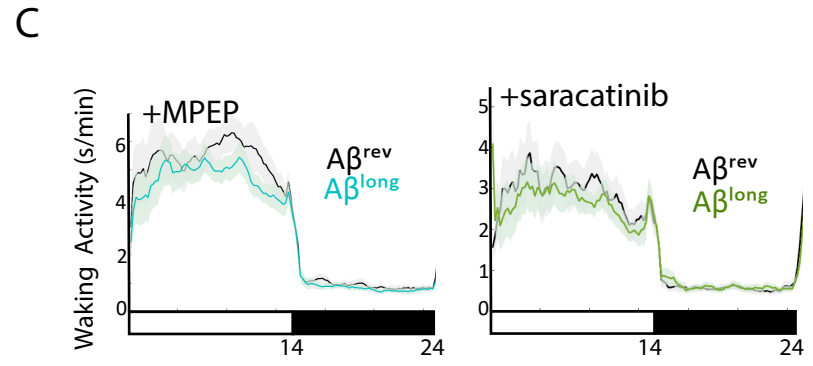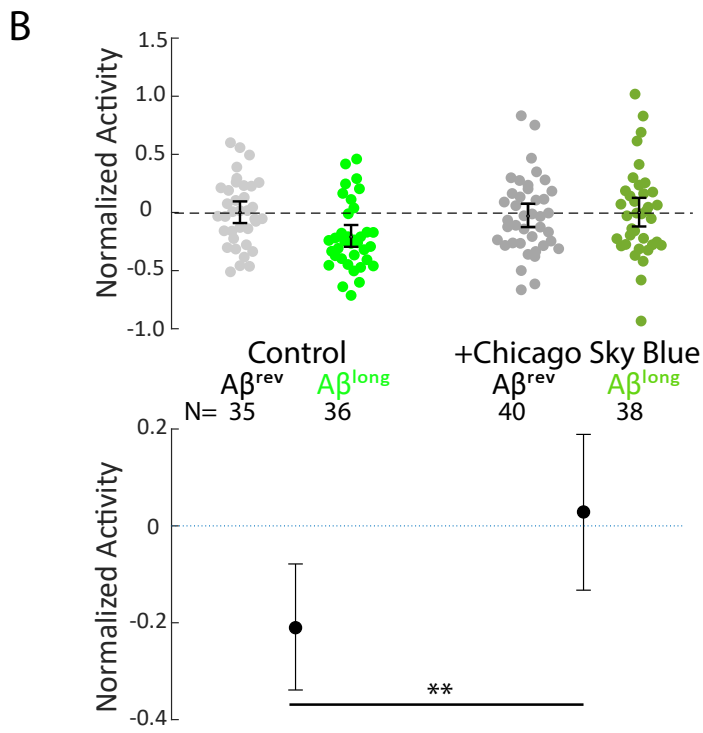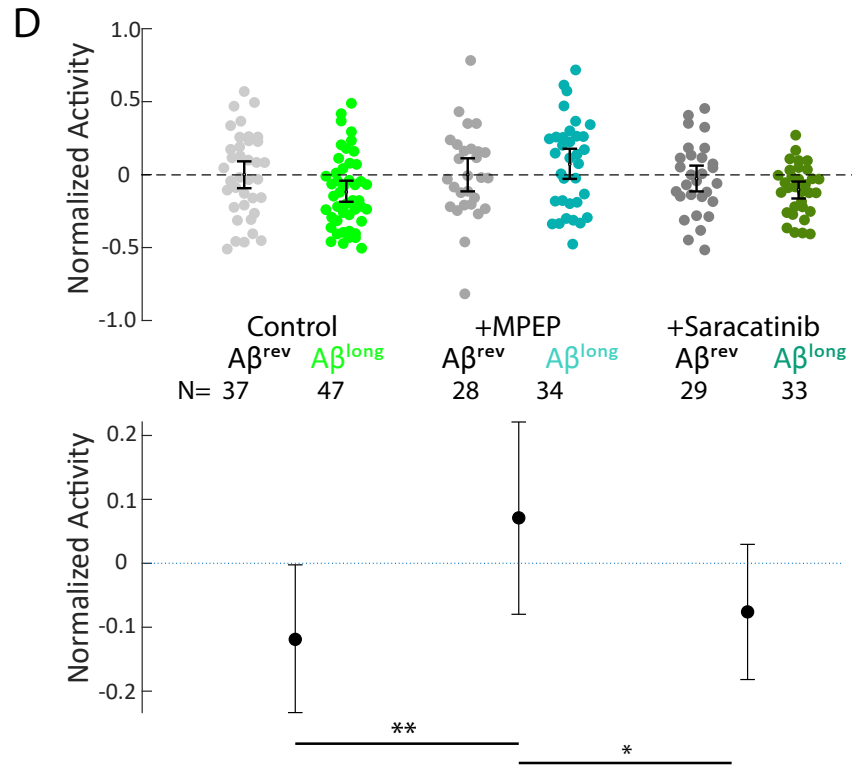

Source: https://www.biorxiv.org/content/10.1101/610014v3.full.pdf
